# Supplementary material
Source: MDPI journal article supplement (https://www.mdpi.com/1999-4907/4/1/1)

Appendix A2: Scatterplots of observed vs. predicted stand parameters (average height (m), top height (m), dbh (cm) and density (stems/ha)) for the conifer and deciduous components by species group (AW, MX and SW) for the SDS dataset.

SDS AW Plots - Conifer Average Height

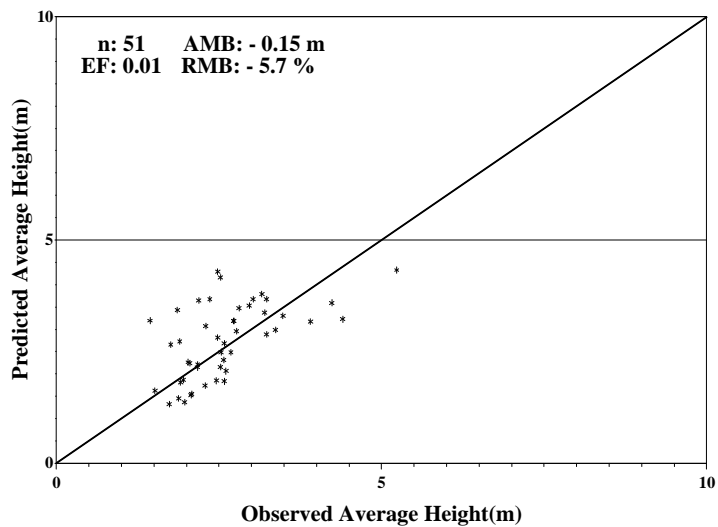

SDS AW Plots - Deciduous Average Height

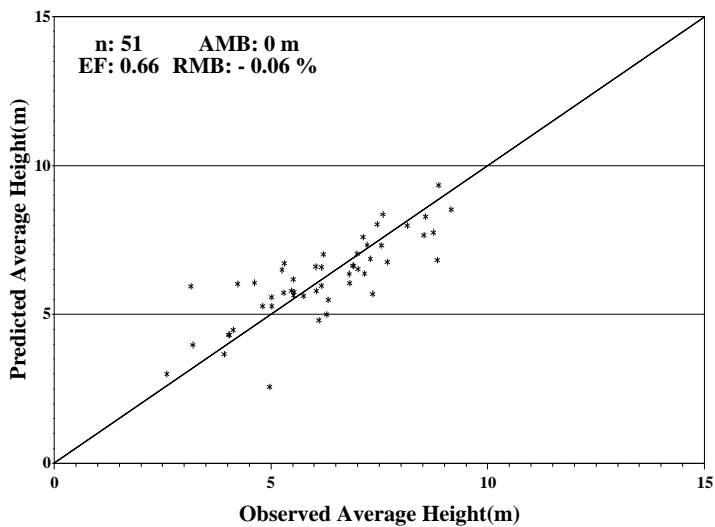

SDS AW Plots - Conifer Top Height

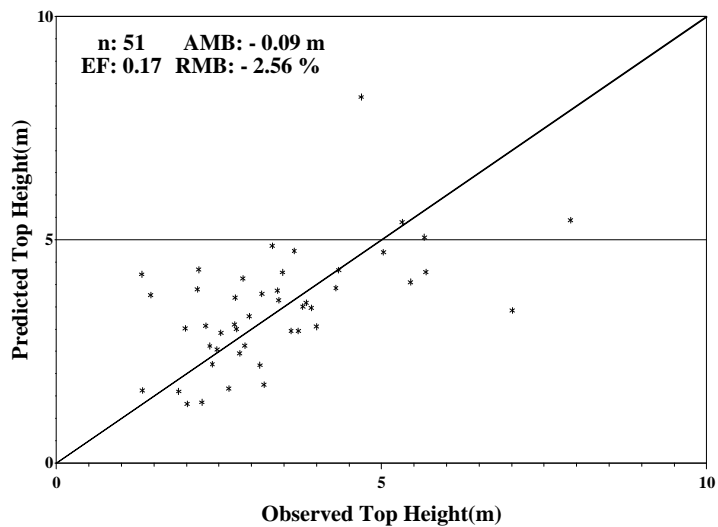

SDS AW Plots - Deciduous Top Height

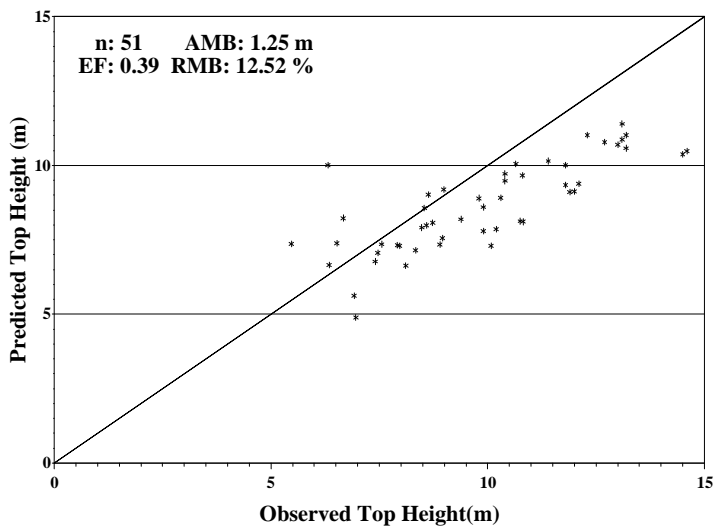

SDS AW Plots - Conifer DBH

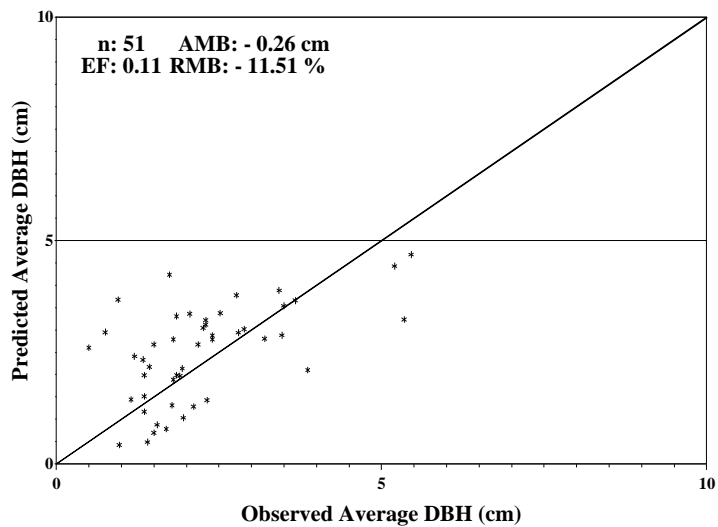

SDS AW Plots - Deciduous DBH

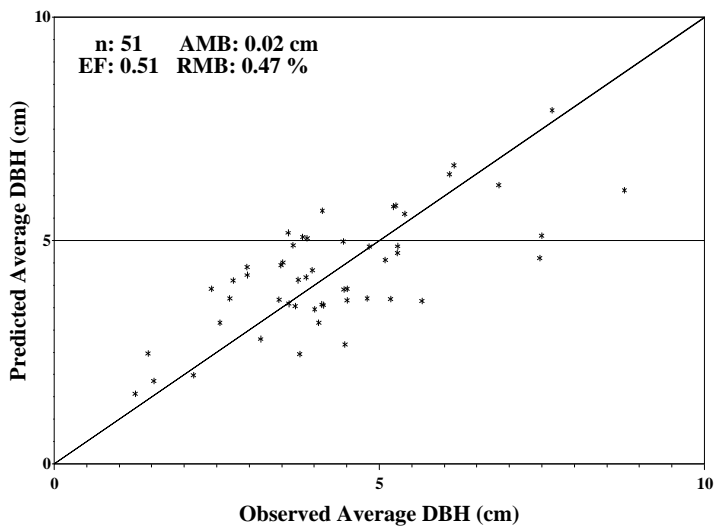

SDS AW Plots - Conifer Density

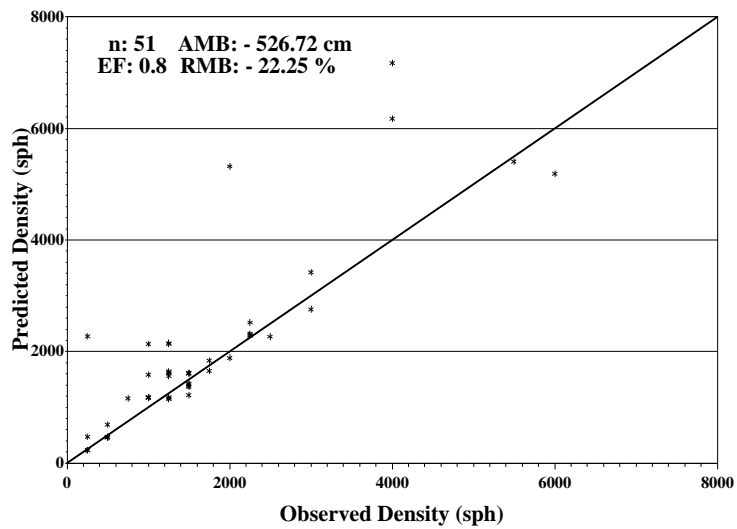

SDS AW Plots - Deciduous Density

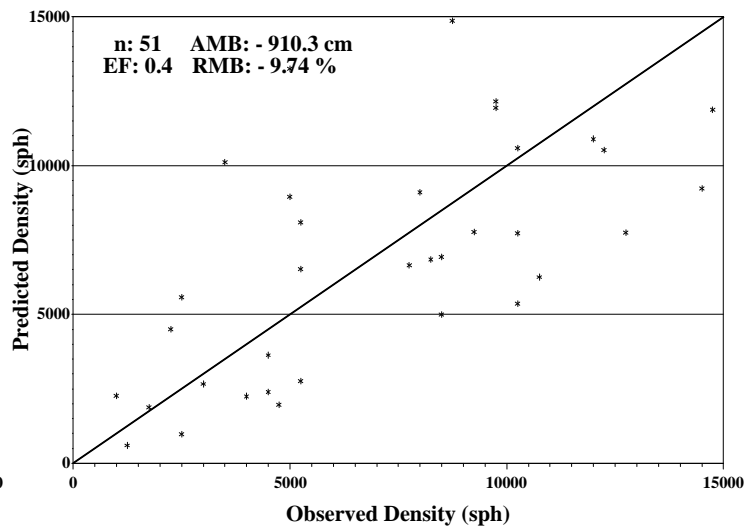

SDS MX Plots - Conifer Average Height

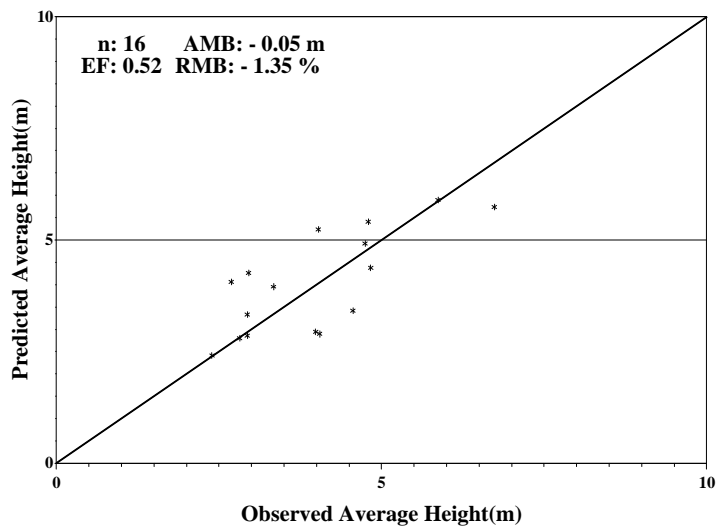

SDS MX Plots - Deciduous Average Height

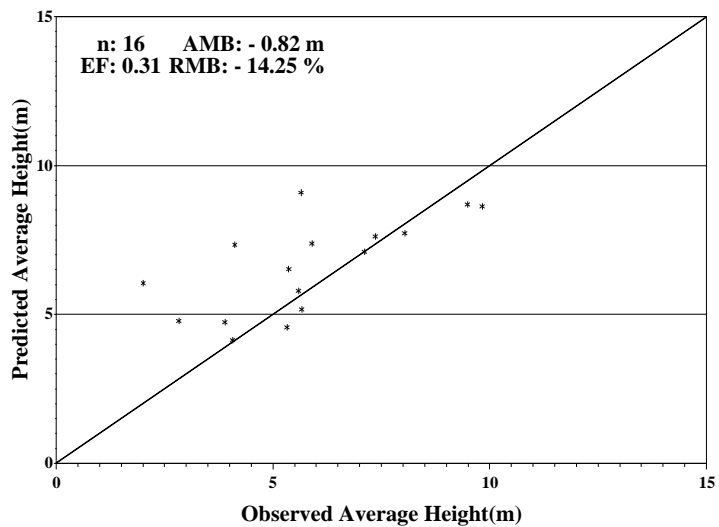

SDS MX Plots - Conifer Top Height

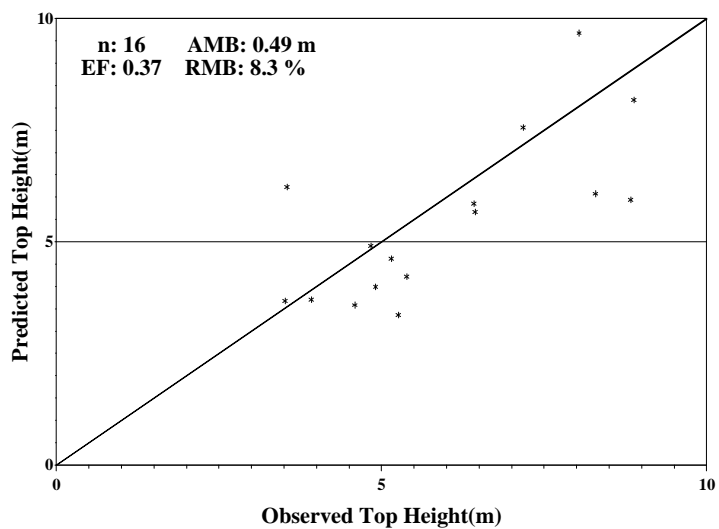

SDS MX Plots - Deciduous Top Height

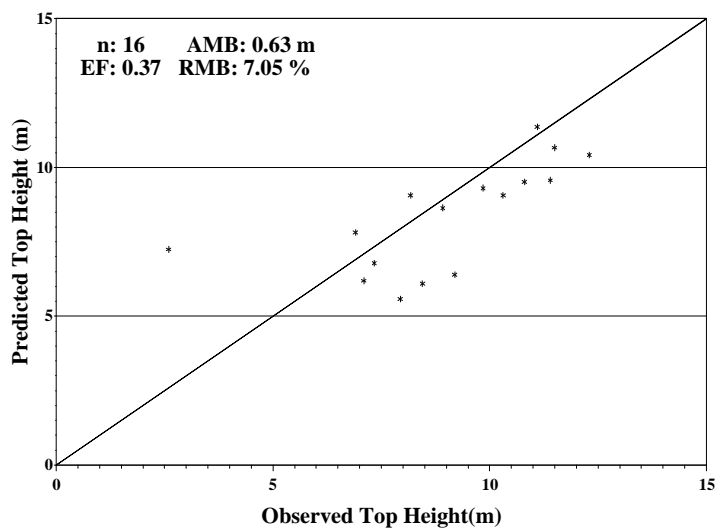

SDS MX Plots - Conifer DBH

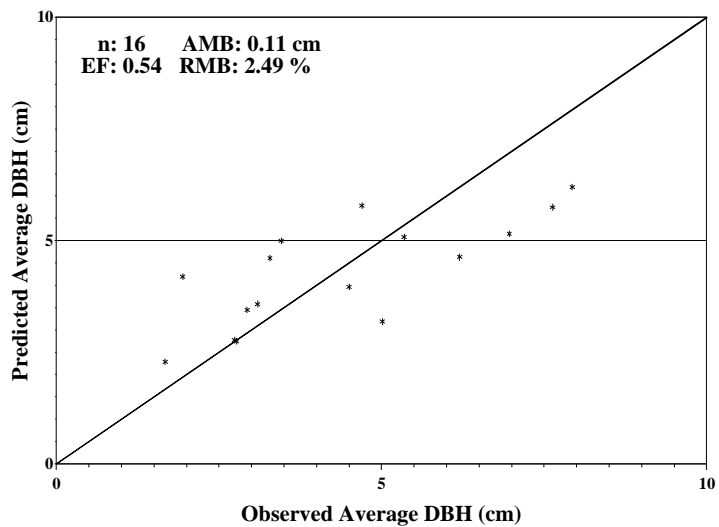

SDS MX Plots - Deciduous DBH

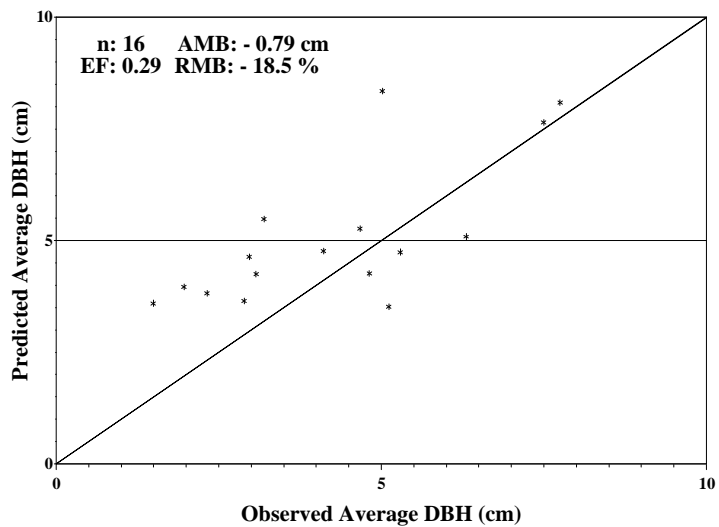

SDS MX Plots - Conifer Density

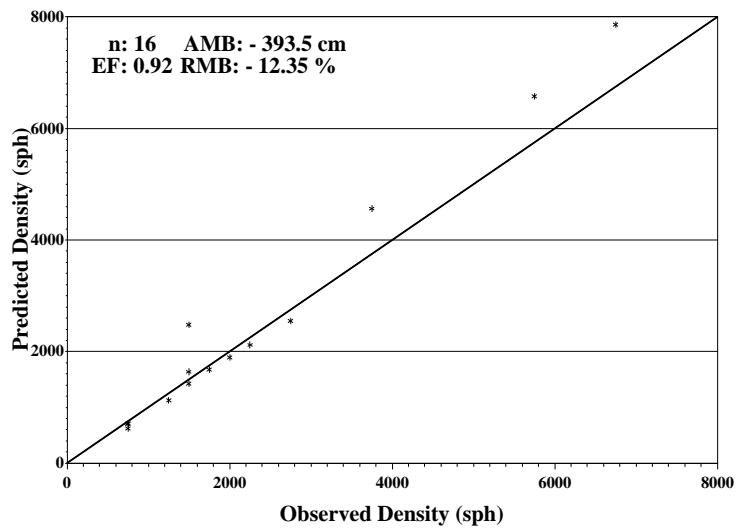

SDS MX Plots - Deciduous Density

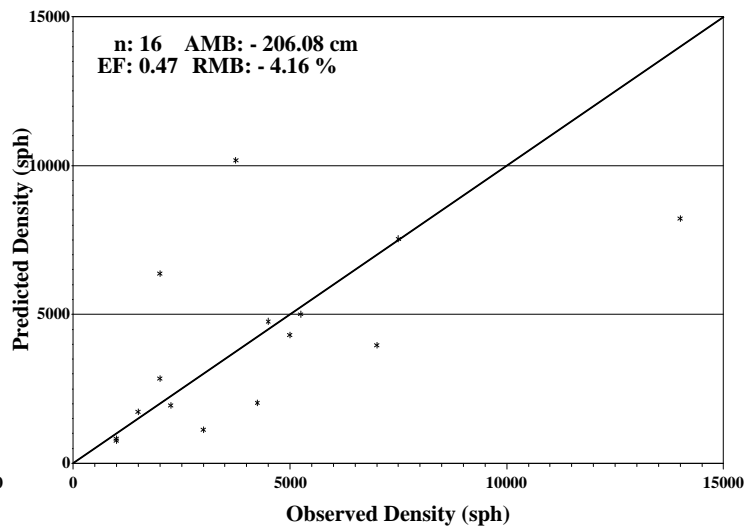

SDS SW Plots - Conifer Average Height

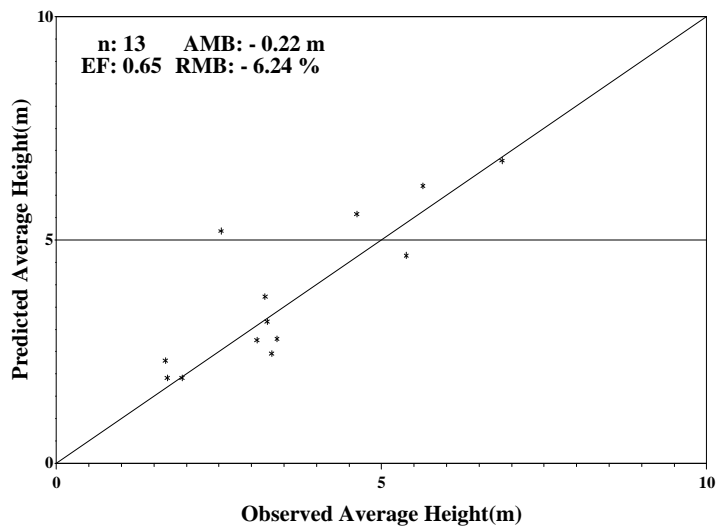

SDS SW Plots - Deciduous Average Height

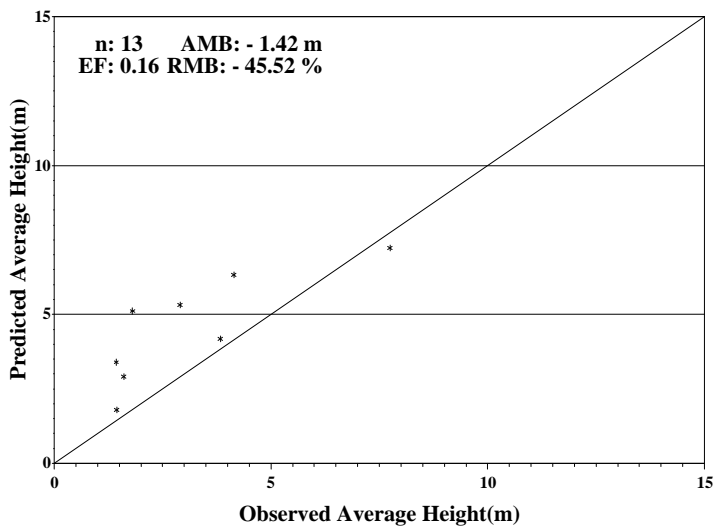

SDS SW Plots - Conifer Top Height

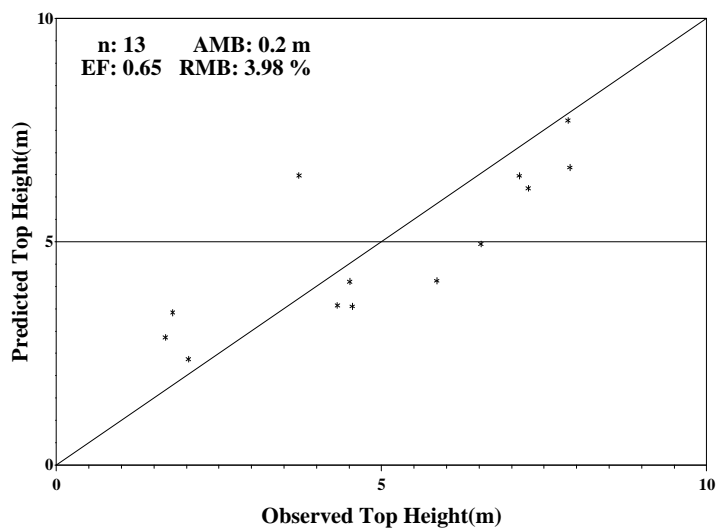

SDS SW Plots - Deciduous Top Height

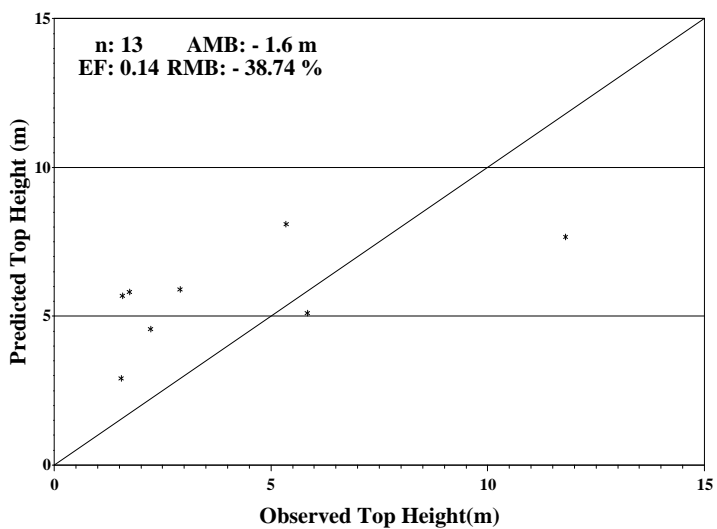

SDS SW Plots - Conifer DBH

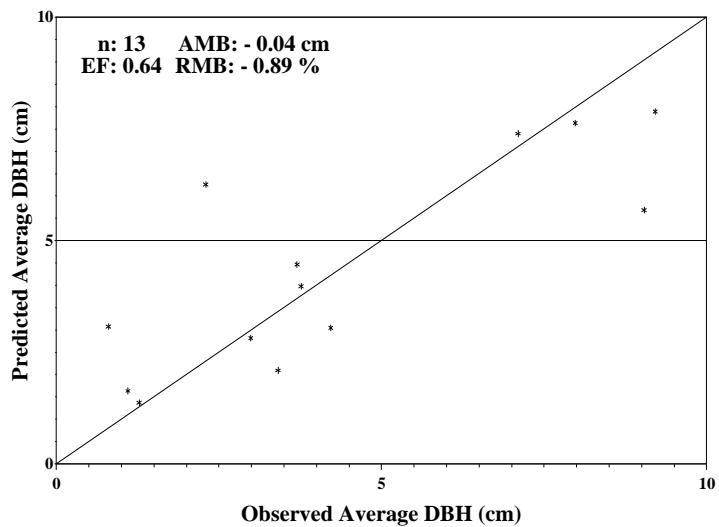

SDS SW Plots - Deciduous DBH

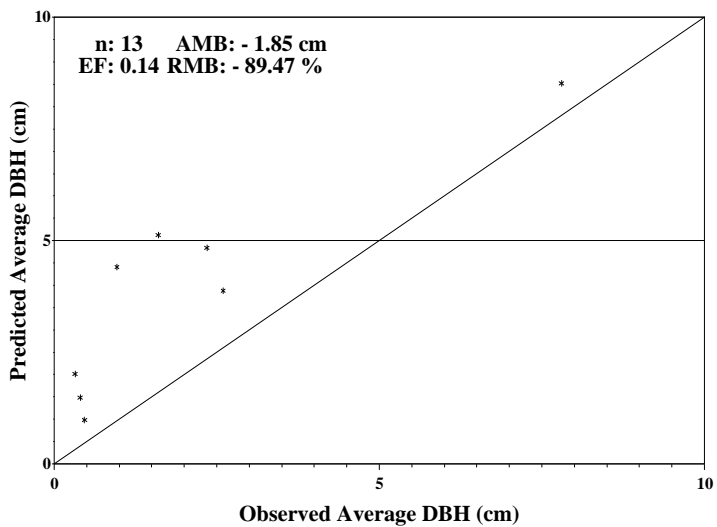

SDS SW Plots - Conifer Density

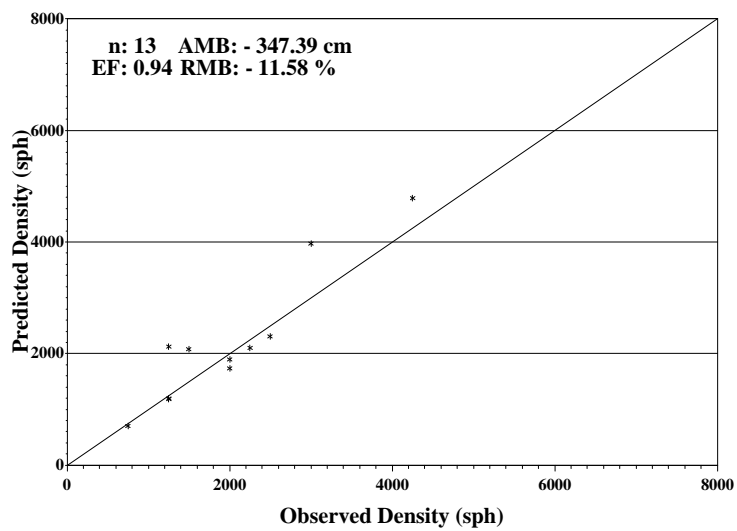

SDS SW Plots - Deciduous Density

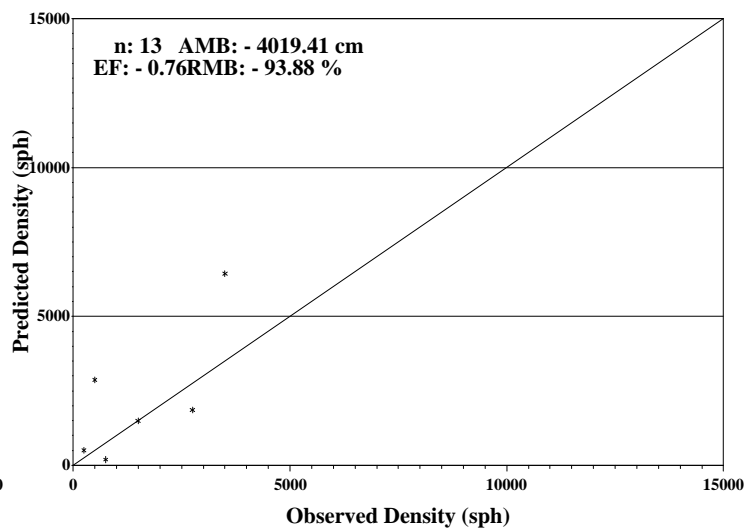

Supplement: s1 [file s1]
