# Supplementary material
Source: MDPI journal article supplement (https://www.mdpi.com/1999-4907/4/1/1)

Appendix A4: Scatterplots of observed vs. predicted stand parameters (volume ( $\text{m}^3$ ), basal area ( $\text{m}^2$ ), top height (m), QMD (cm) and density (stems/ha)) by species group (AW, CD, DC, and SW) for the SSK dataset.

SSK AW Plots - Volume

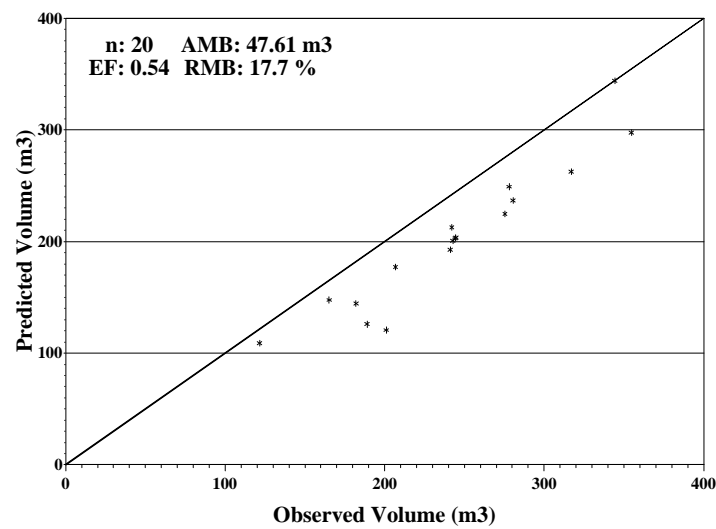

SSK AW Plots - BA

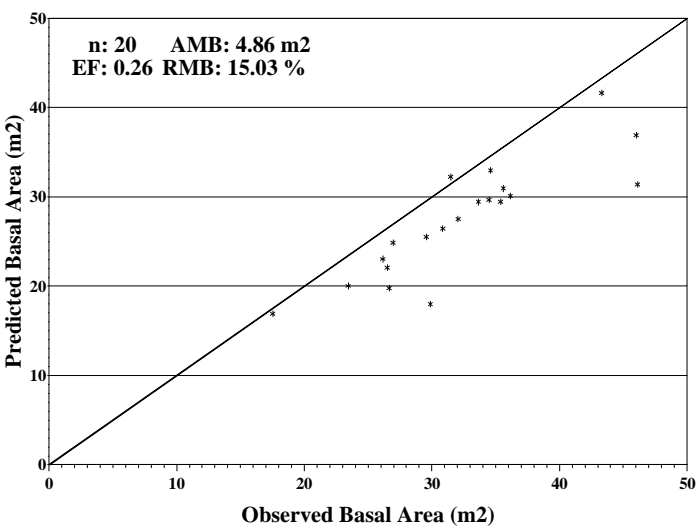

SSK AW Plots - TopHt

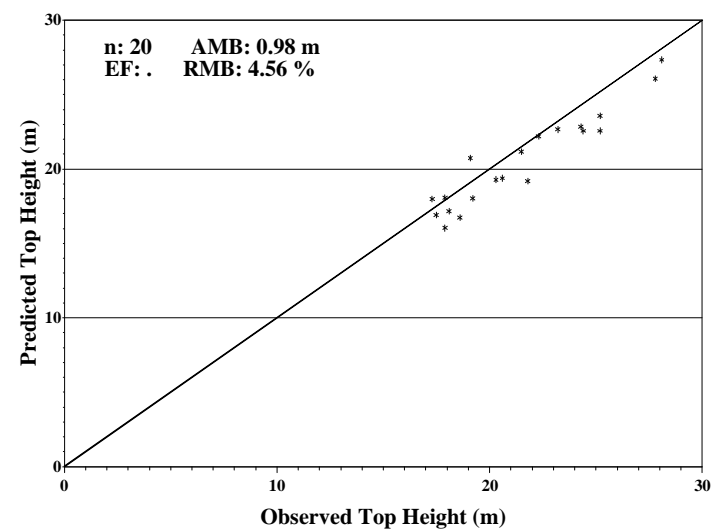

SSK AW Plots - QMD

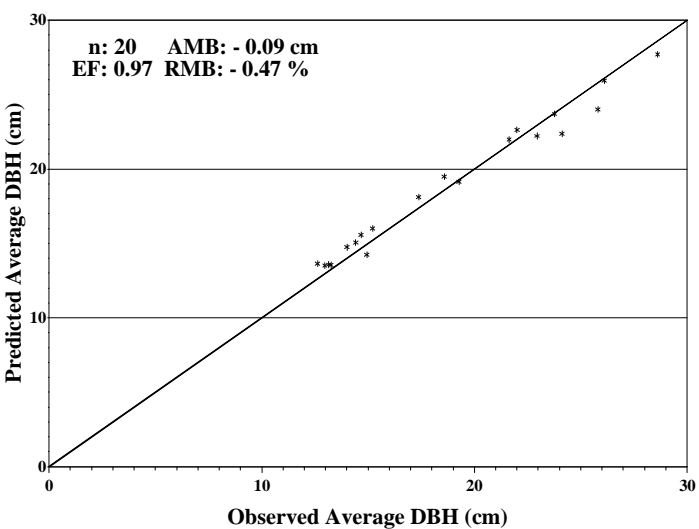

SSK AW Plots - Density

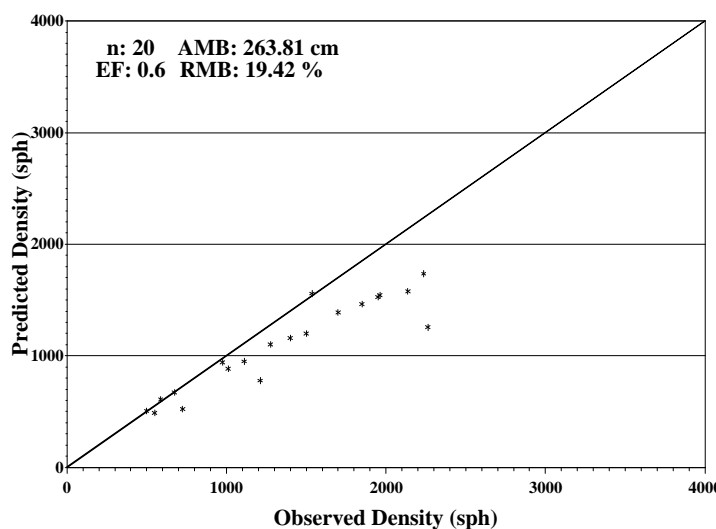

SSK CD Plots - Volume

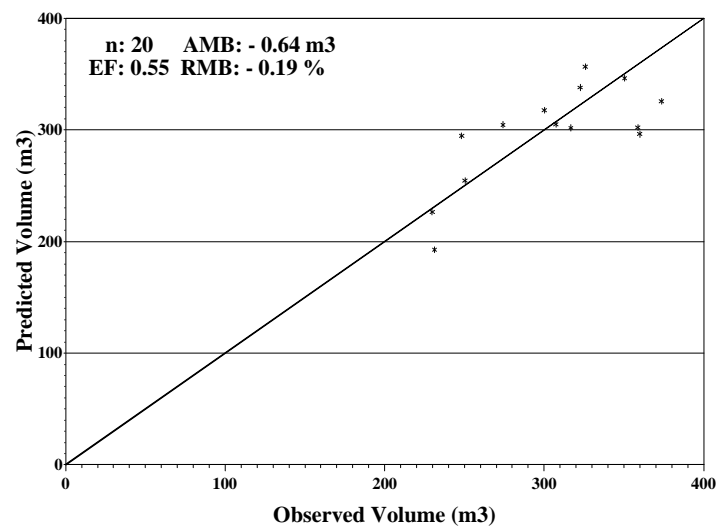

SSK CD Plots - BA

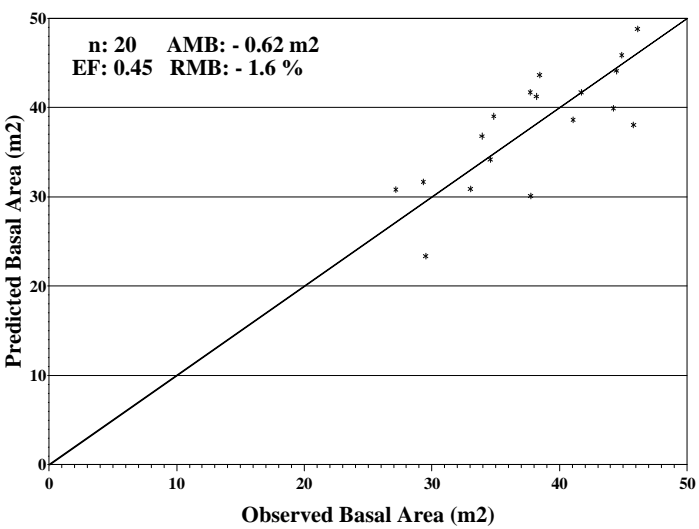

SSK CD Plots - TopHt

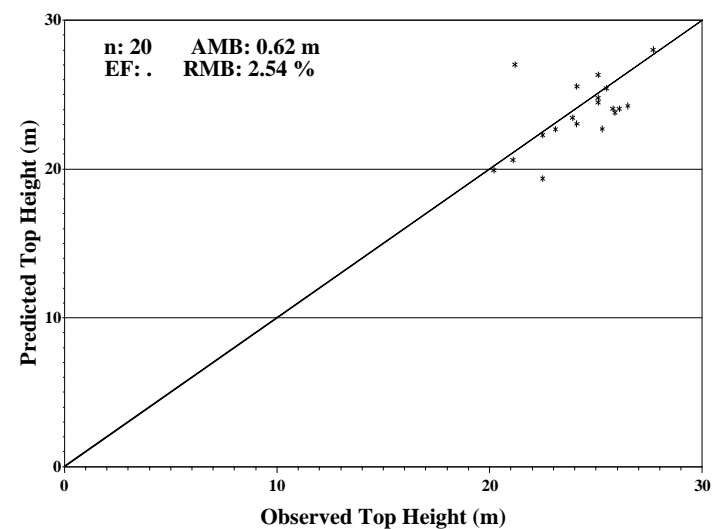

SSK CD Plots - QMD

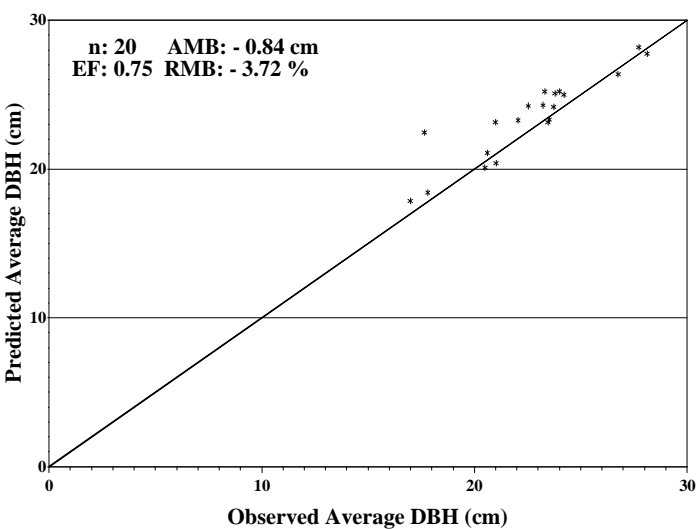

SSK CD Plots - Density

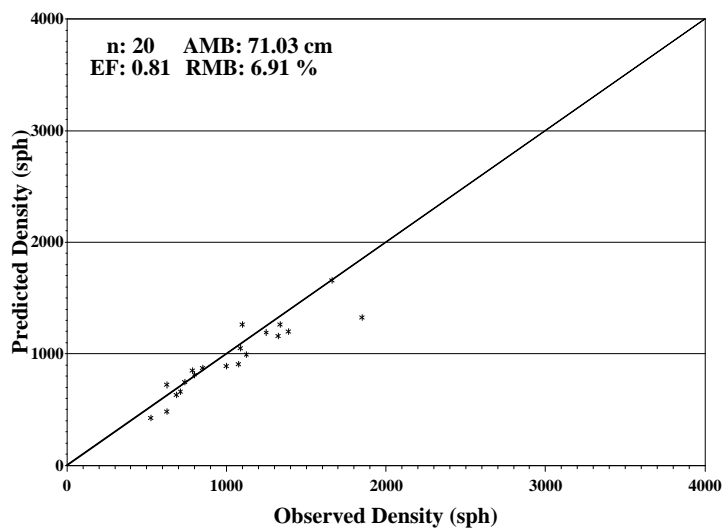

SSK DC Plots - Volume

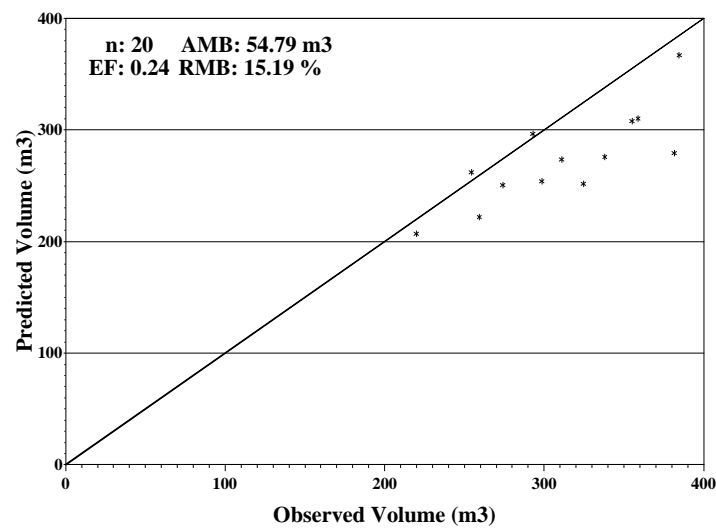

SSK DC Plots - BA

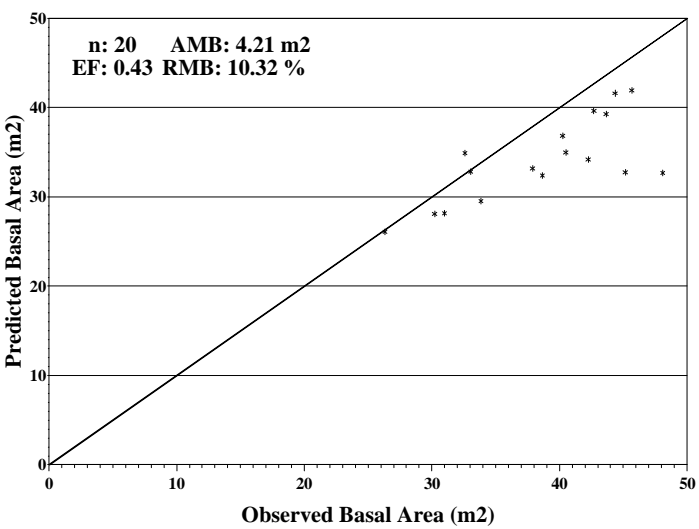

SSK DC Plots - TopHt

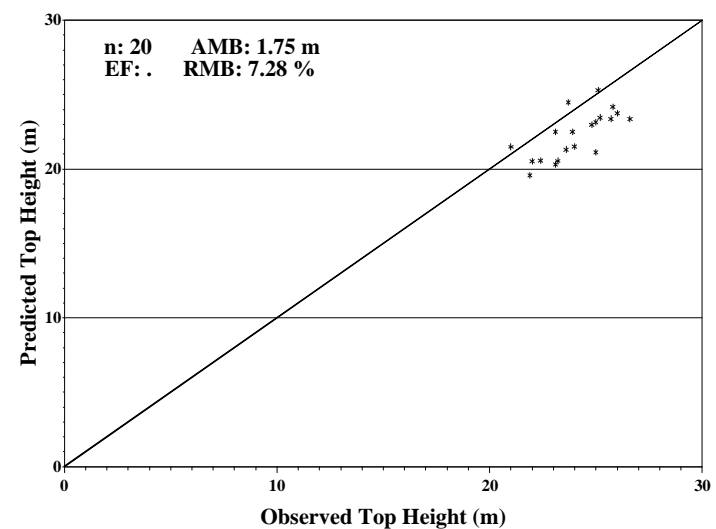

SSK DC Plots - QMD

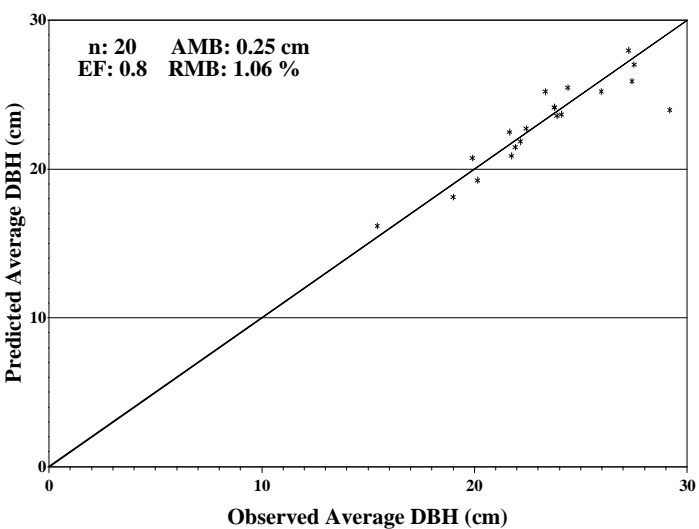

SSK DC Plots - Density

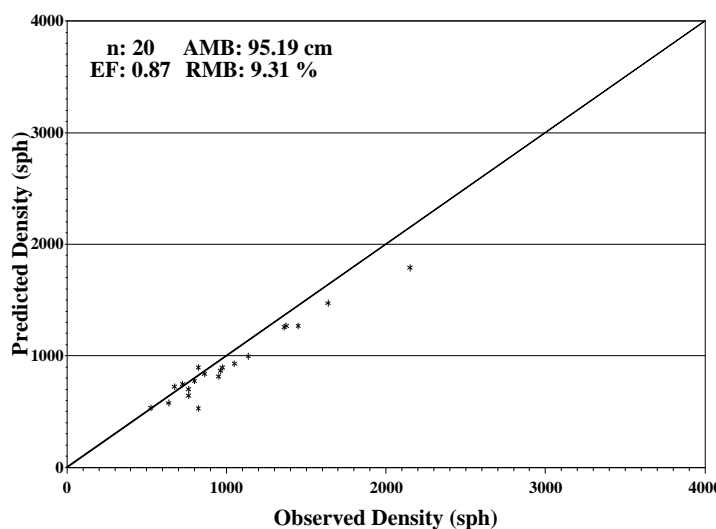

SSK SW Plots - Volume

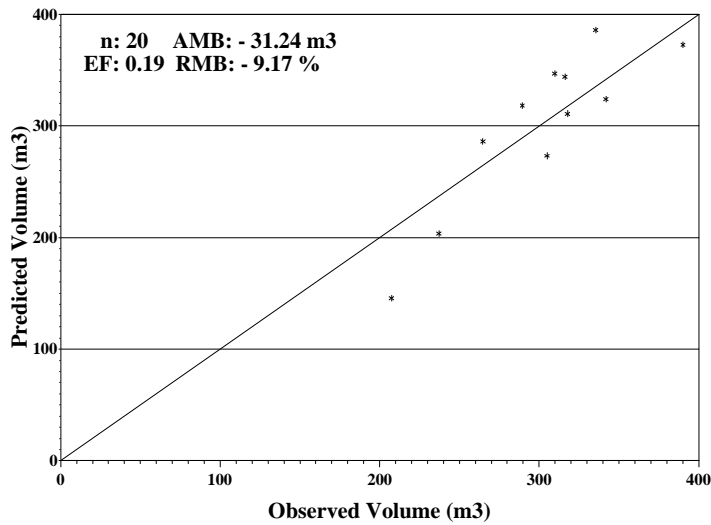

SSK SW Plots - BA

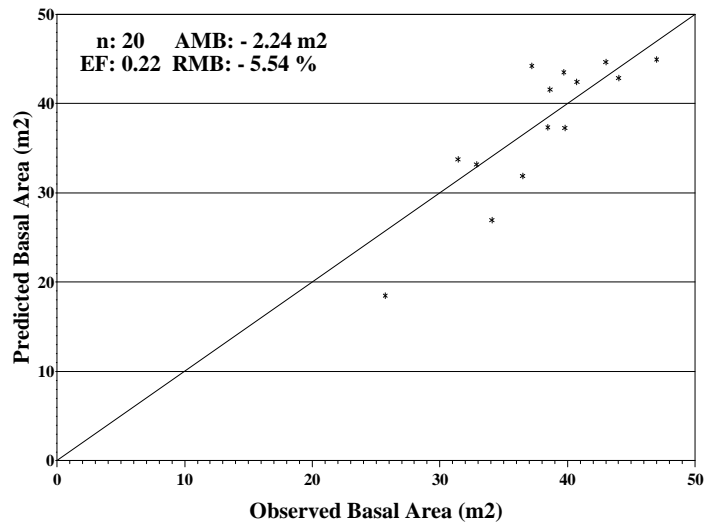

SSK SW Plots - TopHt

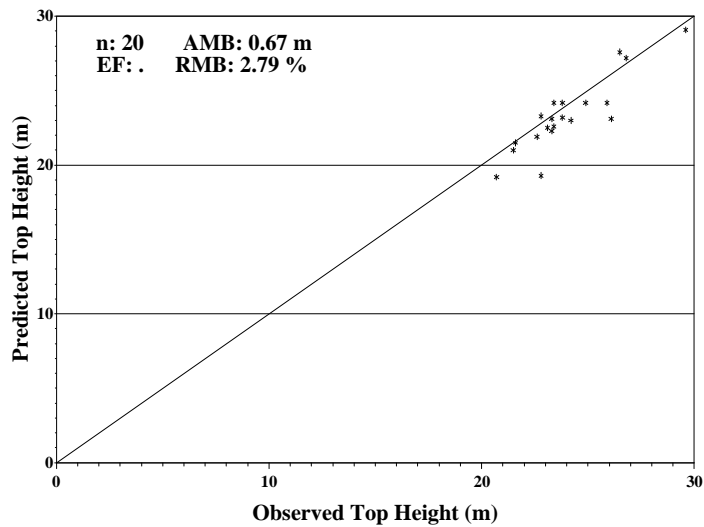

SSK SW Plots - QMD

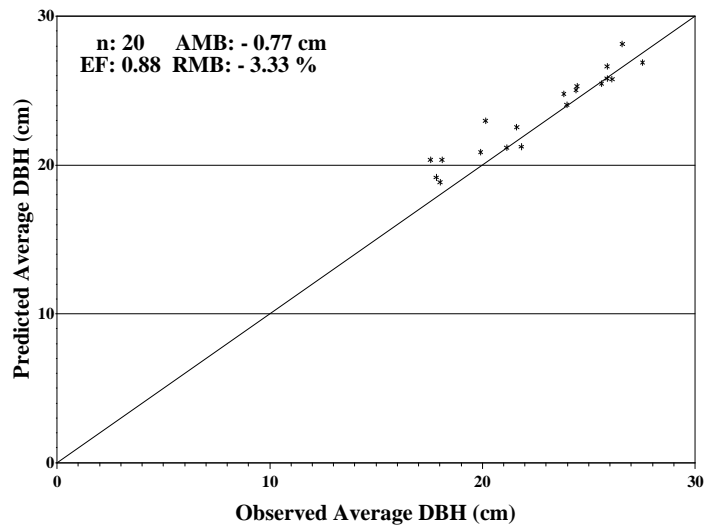

SSK SW Plots - Density

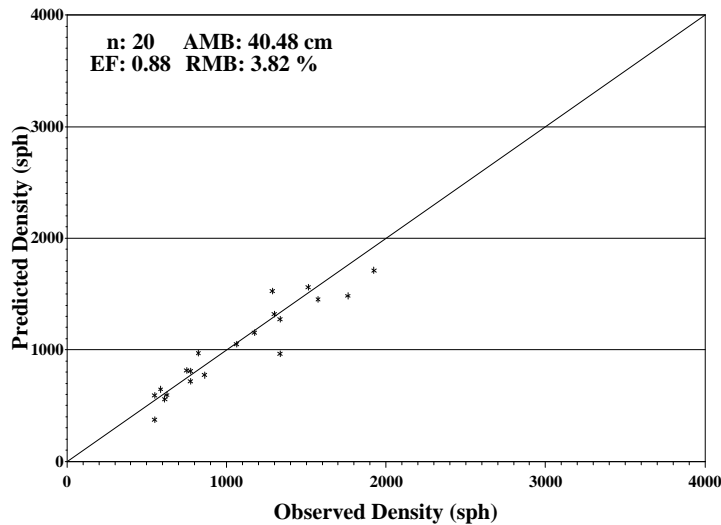

Supplement: s1 [file s1]
