# Supplementary material
Source: MDPI journal article supplement (https://www.mdpi.com/1999-4907/4/1/1)

Appendix A3: Scatterplots of observed vs. predicted stand parameters (average height (m), top height (m), dbh (cm) and density (stems/ha)) for the conifer and deciduous components by species group (AW, MX and SW) for the WSB dataset.

**WSB AW Plots - Conifer Average Height**

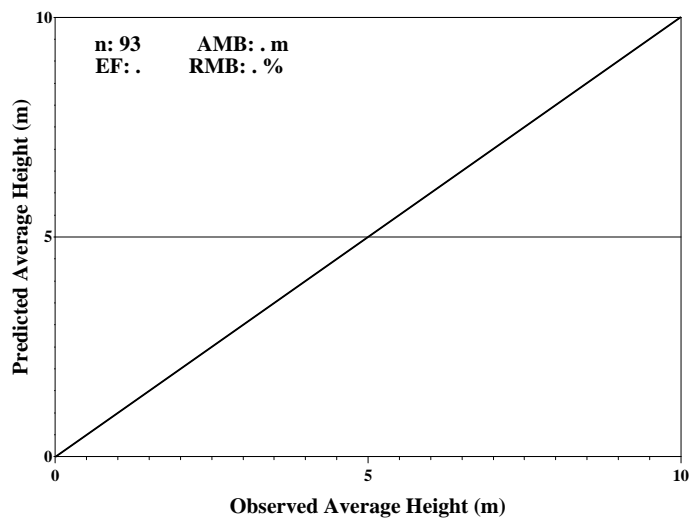

**WSB AW Plots - Deciduous Average Height**

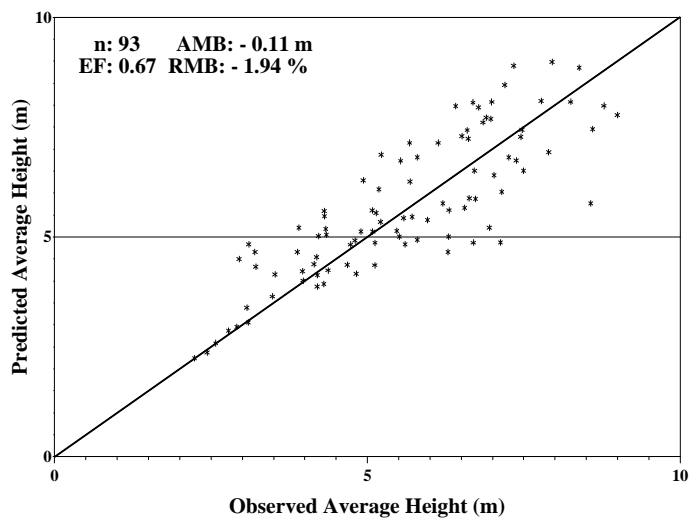

**WSB AW Plots - Conifer Top Height**

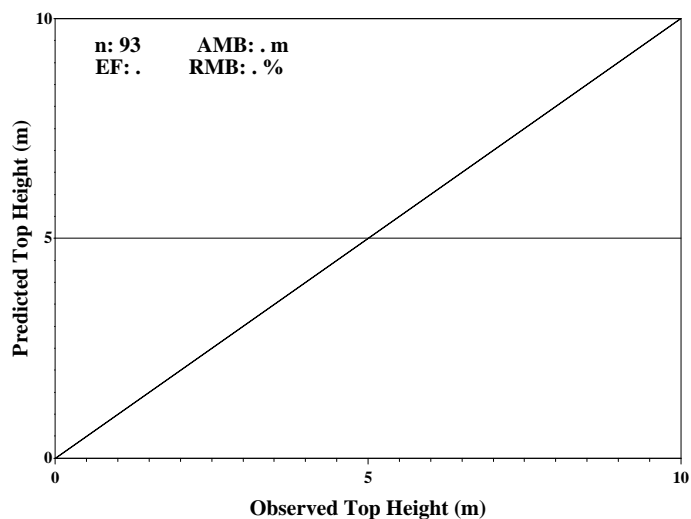

**WSB AW Plots - Deciduous Top Height**

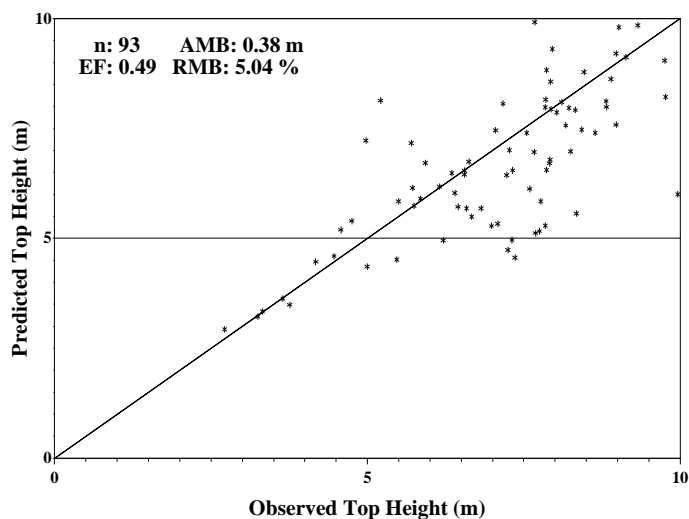

**WSB AW Plots - Conifer DBH**

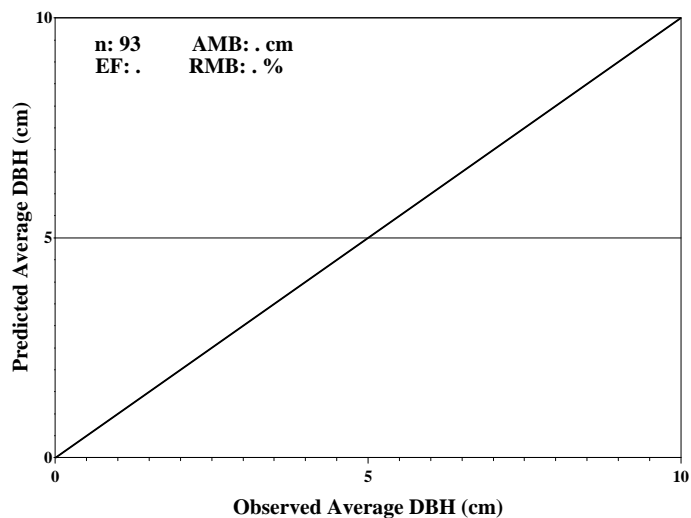

**WSB AW Plots - Deciduous DBH**

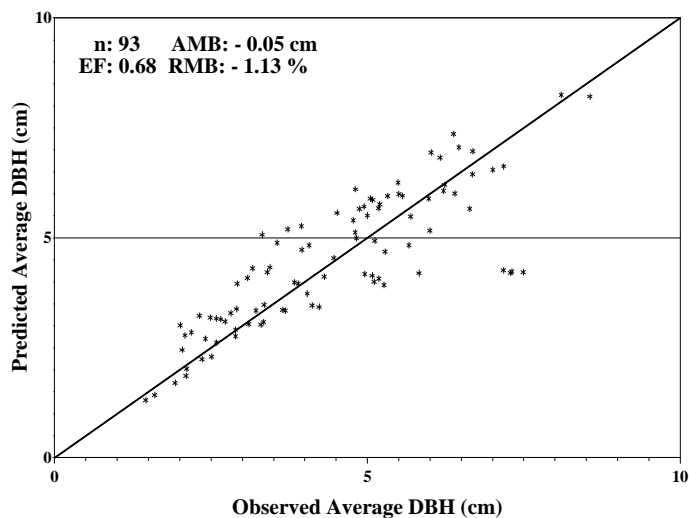

WSB AW Plots - Conifer Density

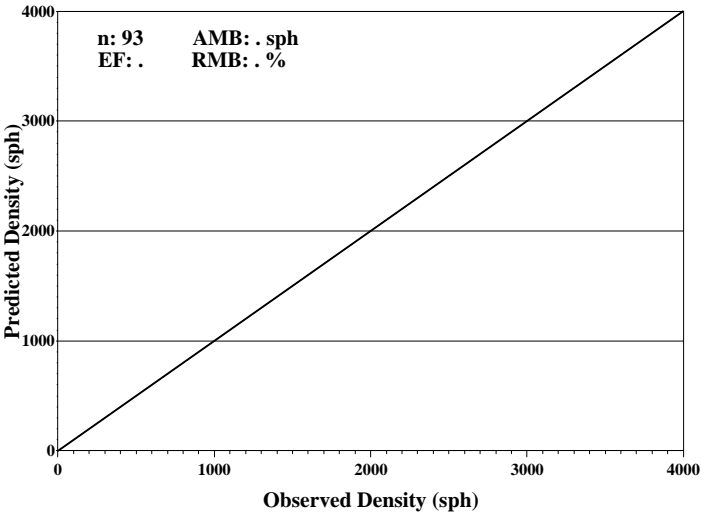

WSB AW Plots - Deciduous Density

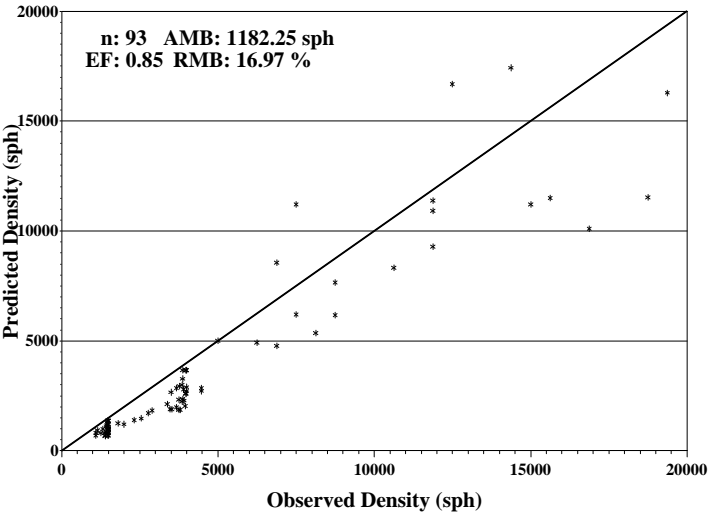

**WSB MX Plots - Conifer Average Height**

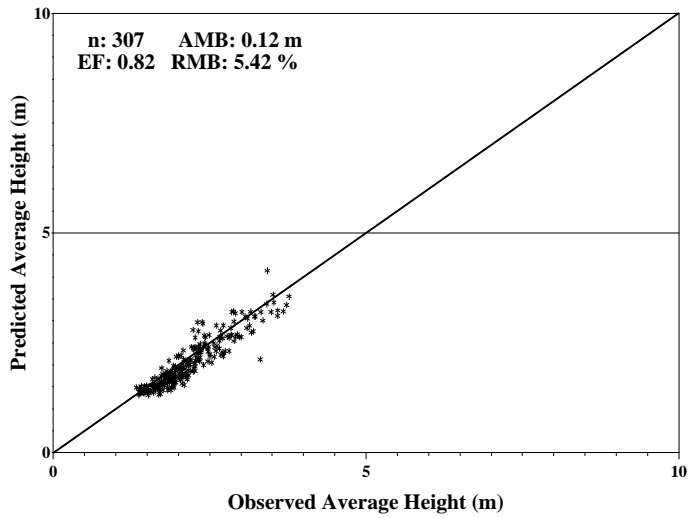

**WSB MX Plots - Deciduous Average Height**

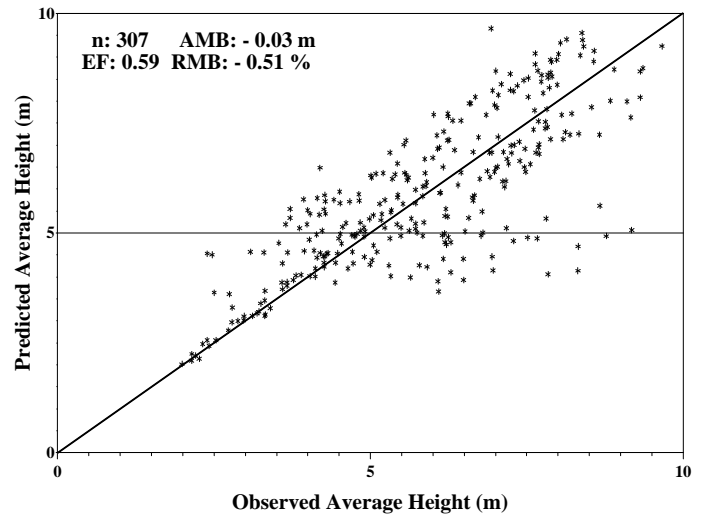

**WSB MX Plots - Conifer Top Height**

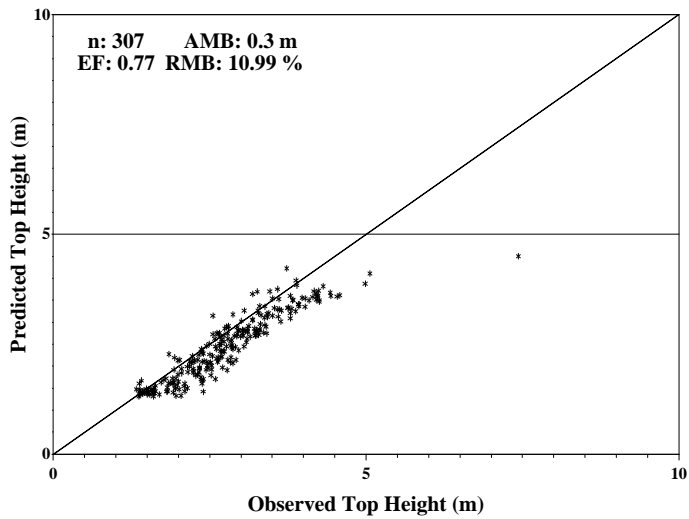

**WSB MX Plots - Deciduous Top Height**

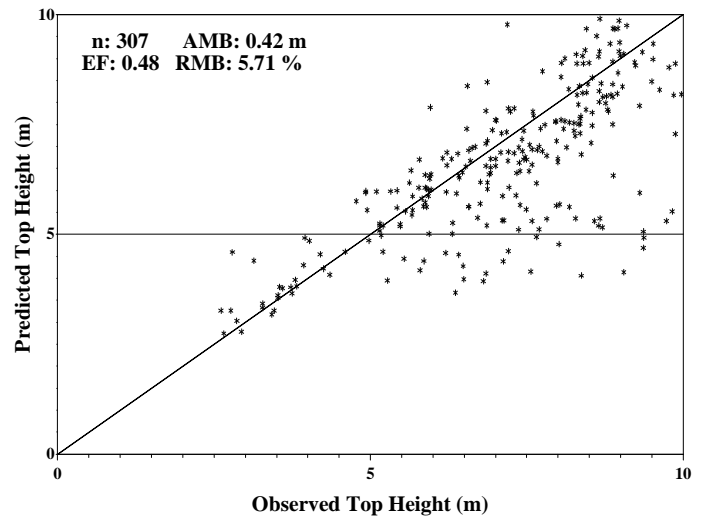

**WSB MX Plots - Conifer DBH**

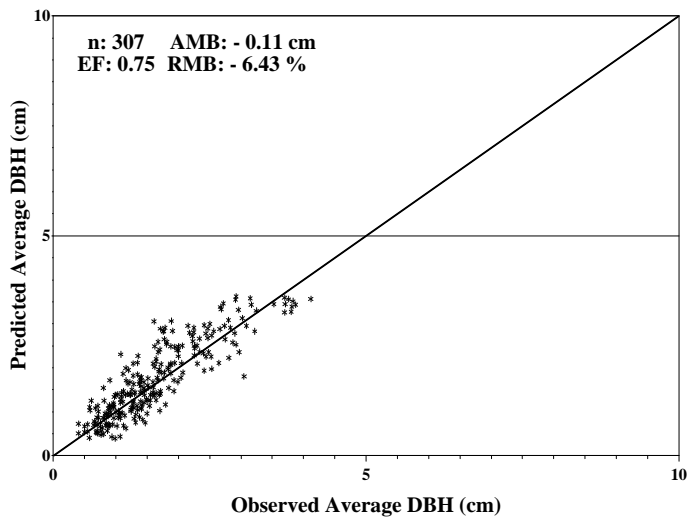

**WSB MX Plots - Deciduous DBH**

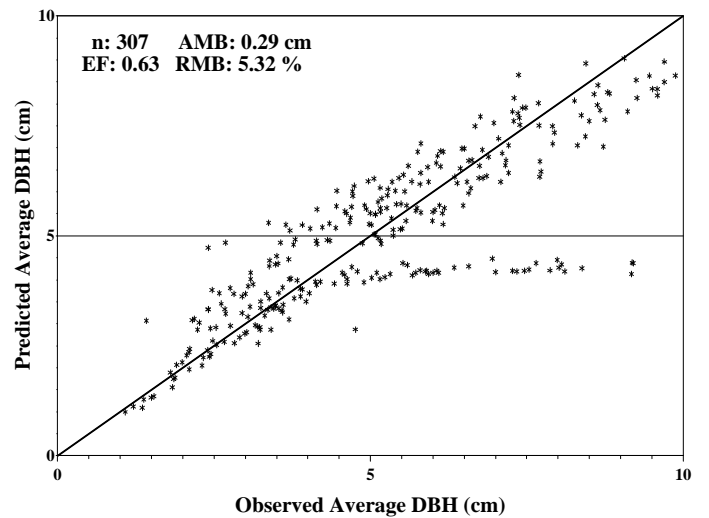

**WSB MX Plots - Conifer Density**

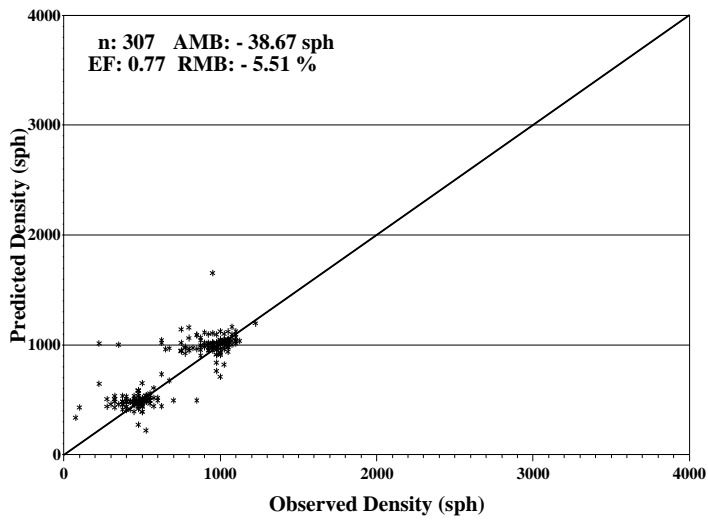

**WSB MX Plots - Deciduous Density**

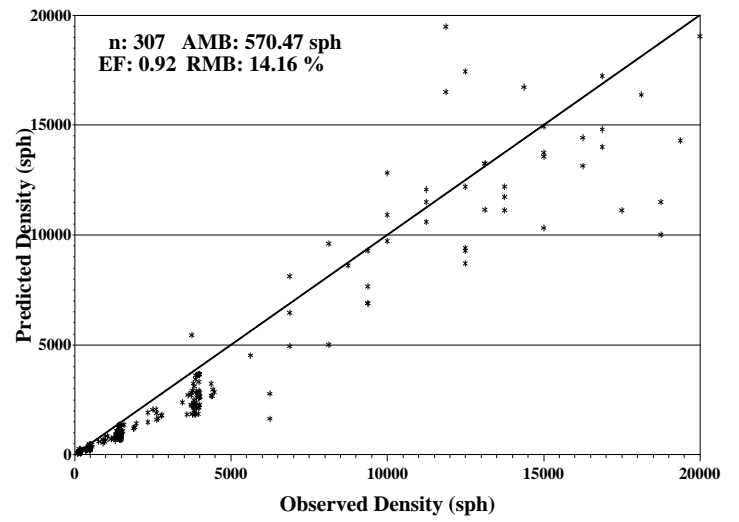

**WSB SW Plots - Conifer Average Height**

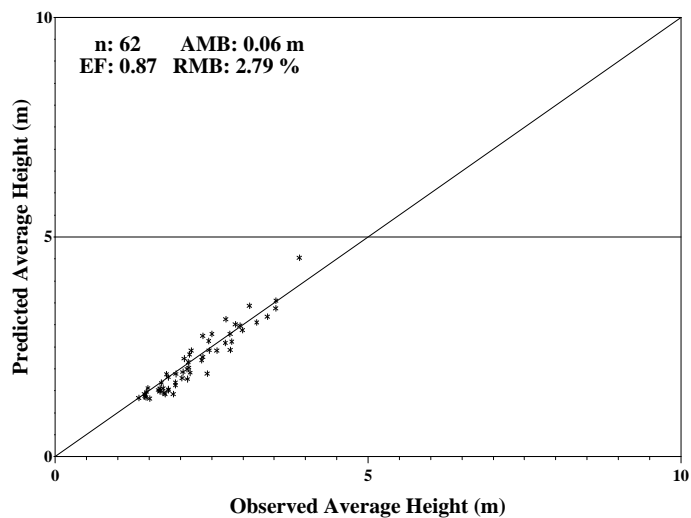

**WSB SW Plots - Deciduous Average Height**

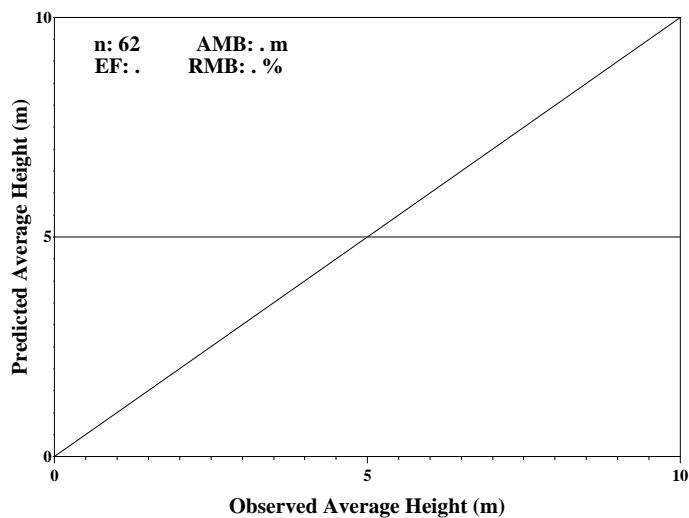

**WSB SW Plots - Conifer Top Height**

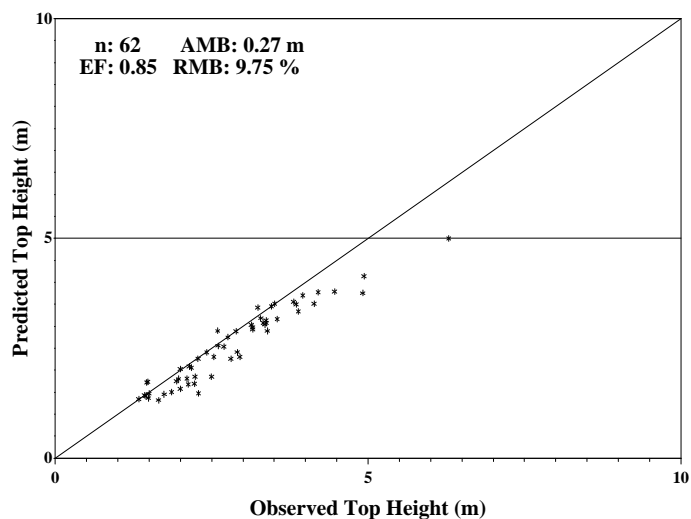

**WSB SW Plots - Deciduous Top Height**

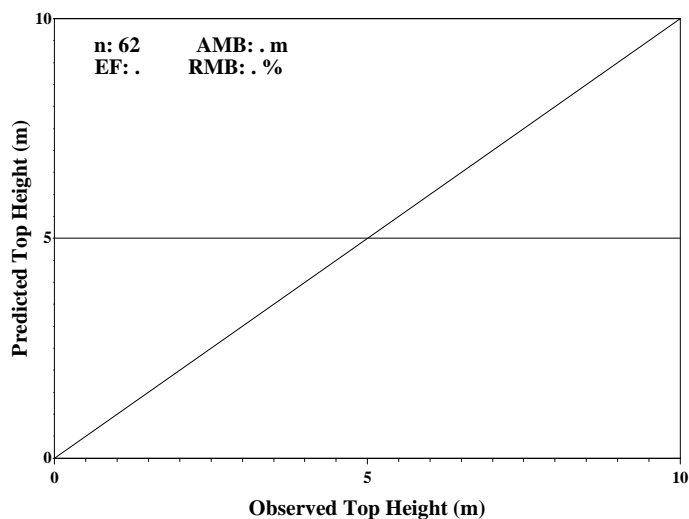

**WSB SW Plots - Conifer DBH**

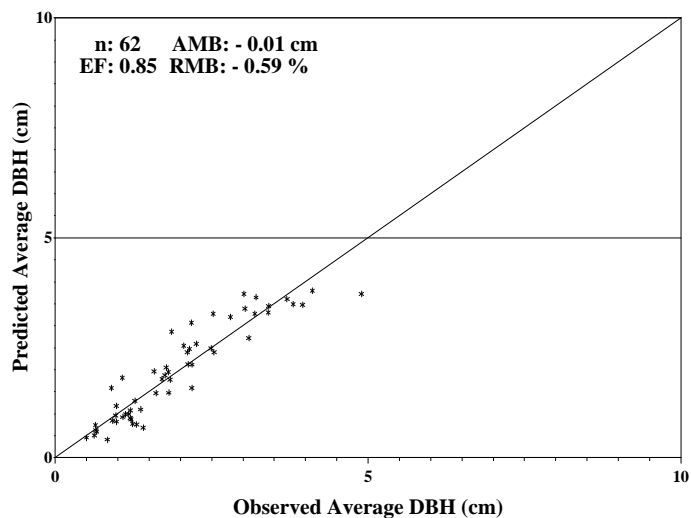

**WSB SW Plots - Deciduous DBH**

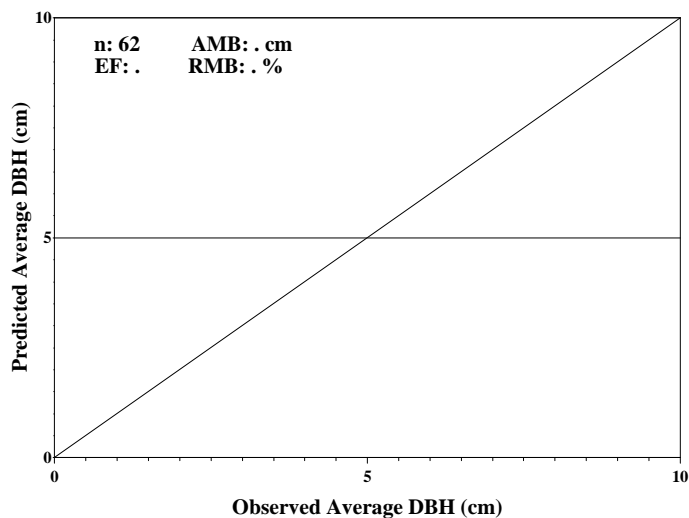

**WSB SW Plots - Conifer Density**

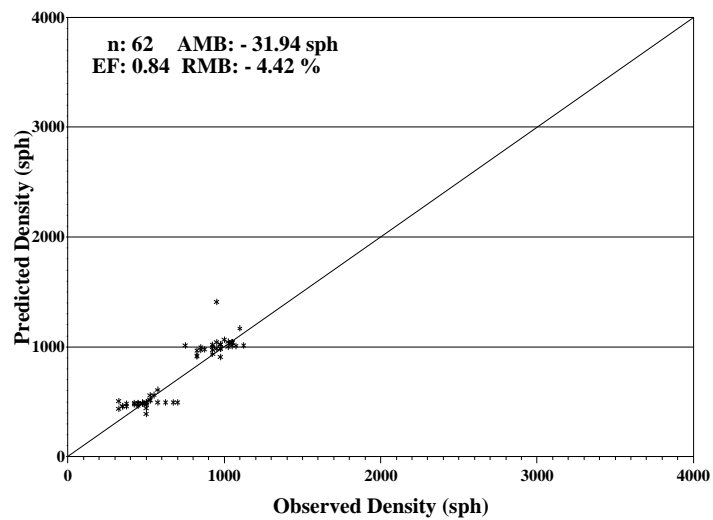

**WSB SW Plots - Deciduous Density**

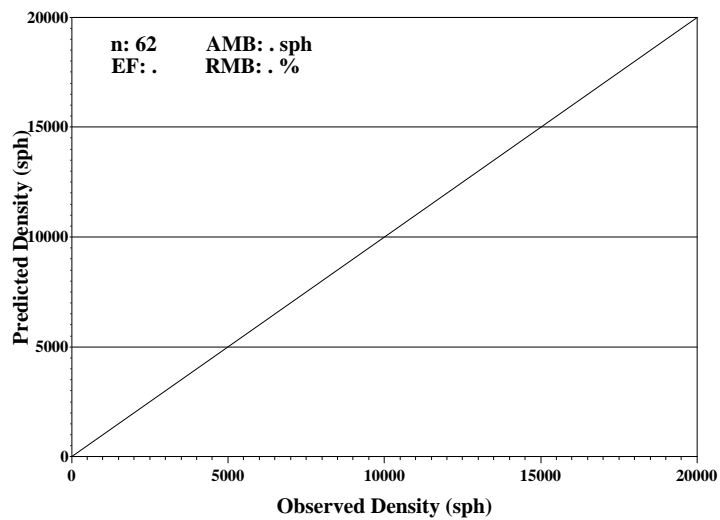

Supplement: s1 [file s1]
