# Supplementary material
Source: MDPI journal article supplement (https://www.mdpi.com/1999-4907/4/1/1)

Appendix A1: Scatterplots of observed vs. predicted stand parameters (volume ( $\text{m}^3$ ), basal area ( $\text{m}^2$ ), dbh (cm), average height (m), density (stems/ha) and top height (m)) for the conifer and deciduous components by species group (AW, CD, DC and SW) for the SRD dataset.

**SRD AW Plots - Conifer Volume**

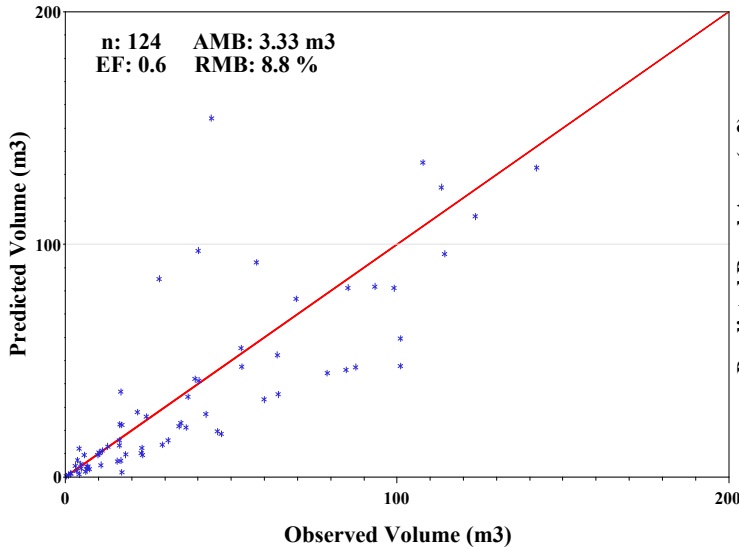

**SRD AW Plots - Conifer Basal Area**

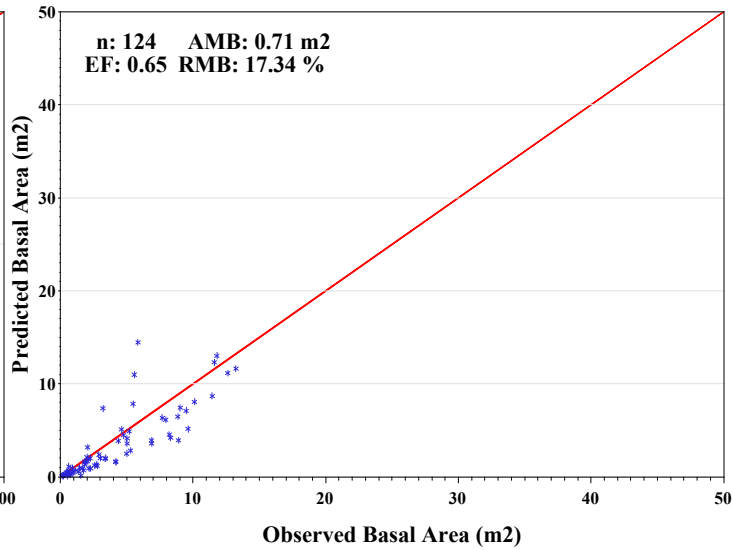

**SRD AW Plots - Conifer Average Height**

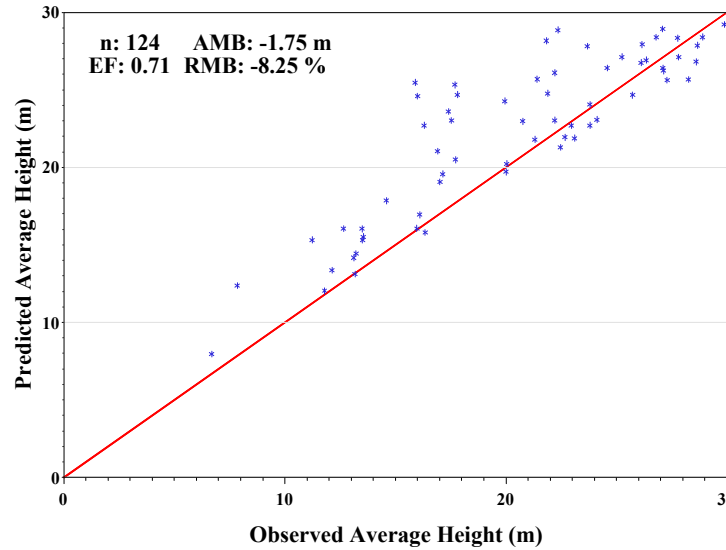

**SRD AW Plots - Conifer Top Height**

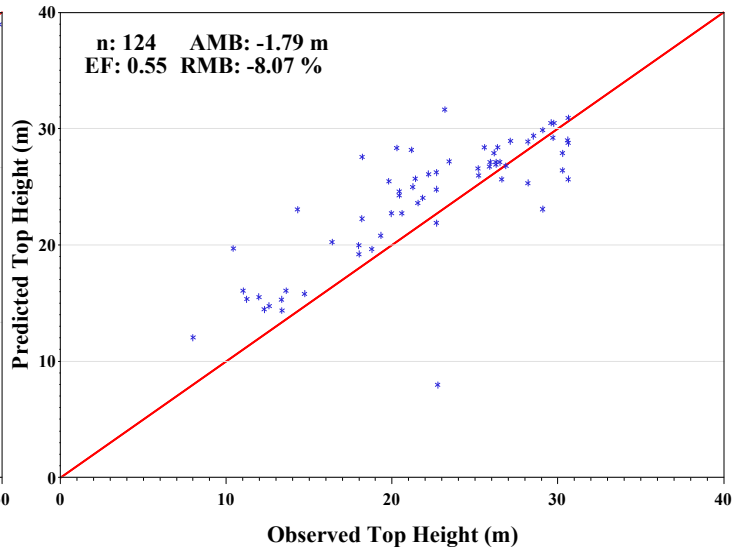

**SRD AW Plots - Conifer DBH**

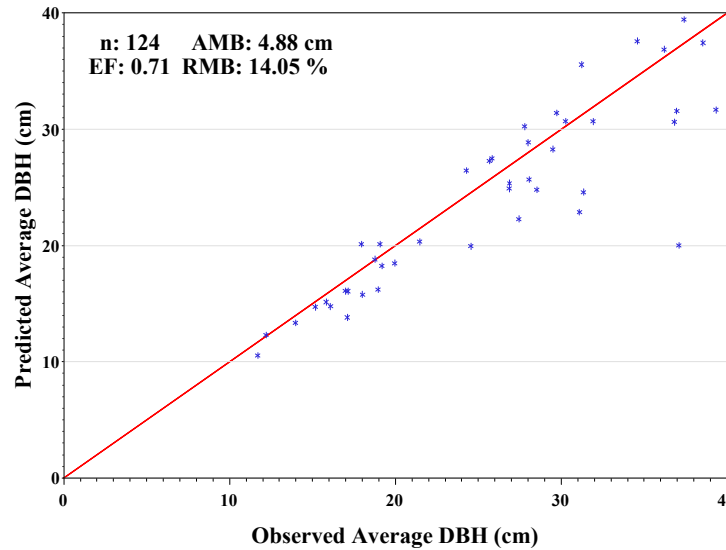

**SRD AW Plots - Conifer Density**

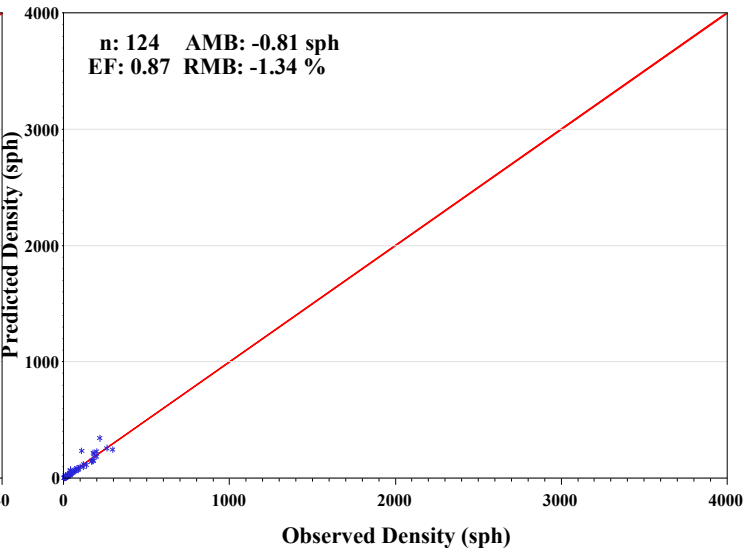

**SRD AW Plots - Deciduous Volume**

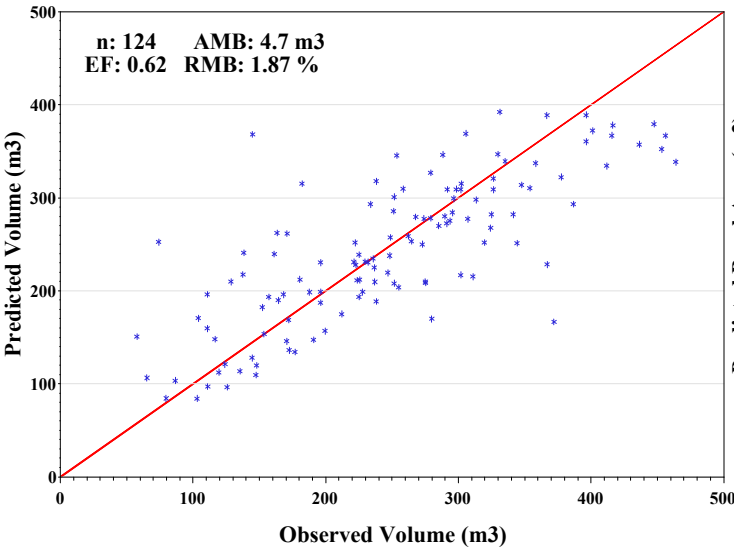

**SRD AW Plots - Deciduous Basal Area**

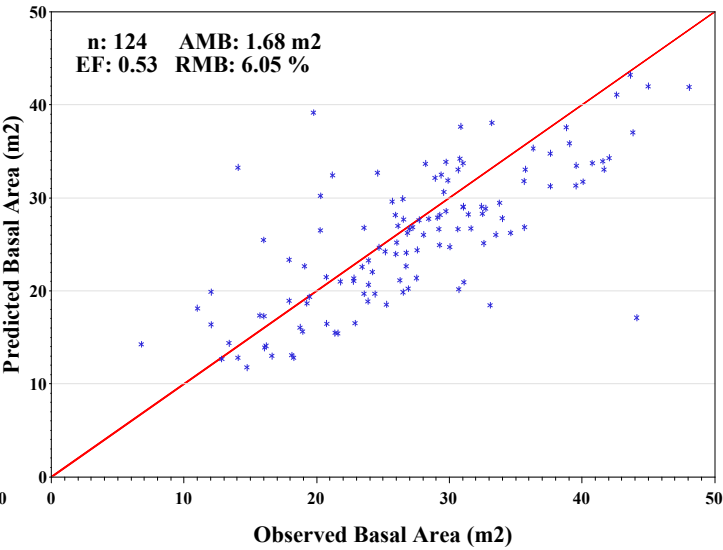

**SRD AW Plots - Deciduous Average Height**

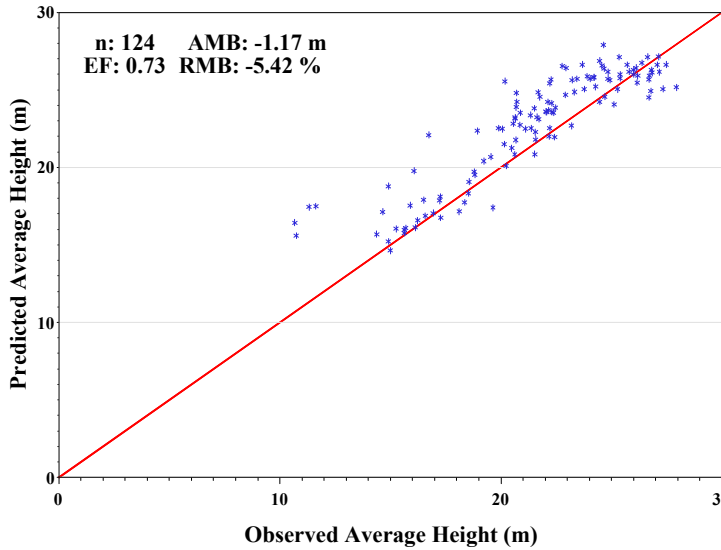

**SRD AW Plots - Deciduous Top Height**

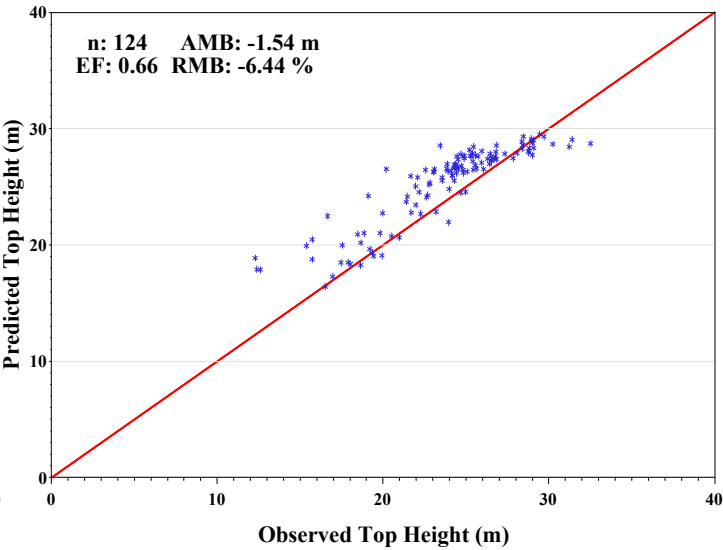

**SRD AW Plots - Deciduous DBH**

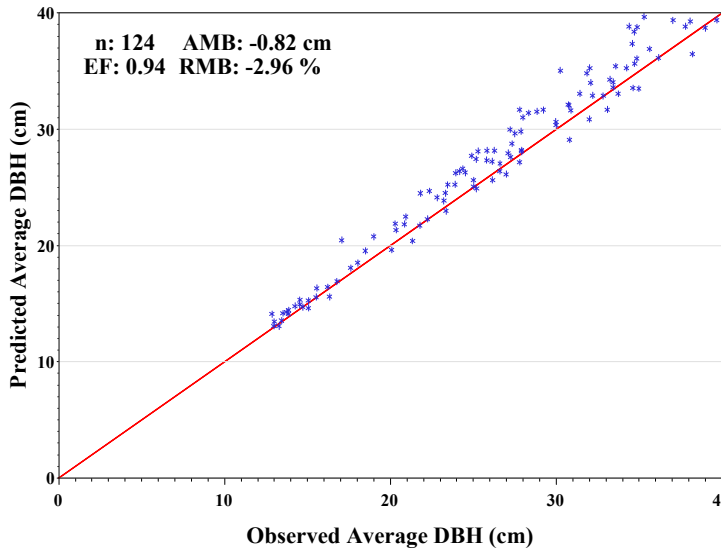

**SRD AW Plots - Deciduous Density**

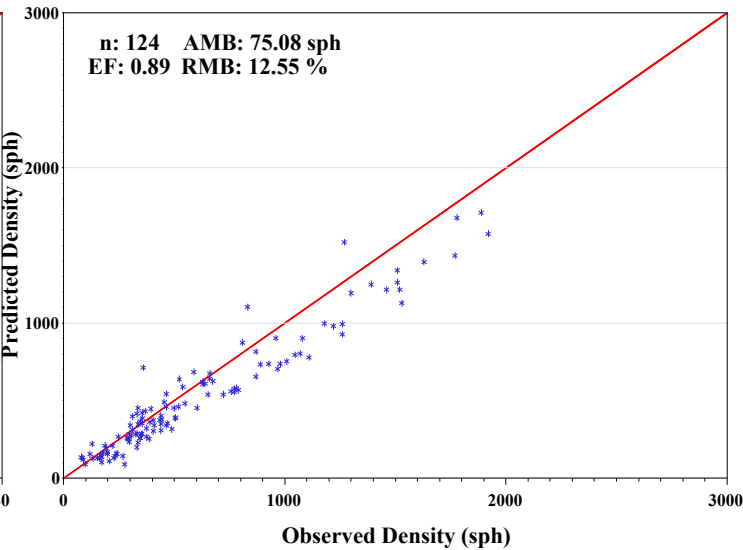

**SRD CD Plots - Conifer Volume**

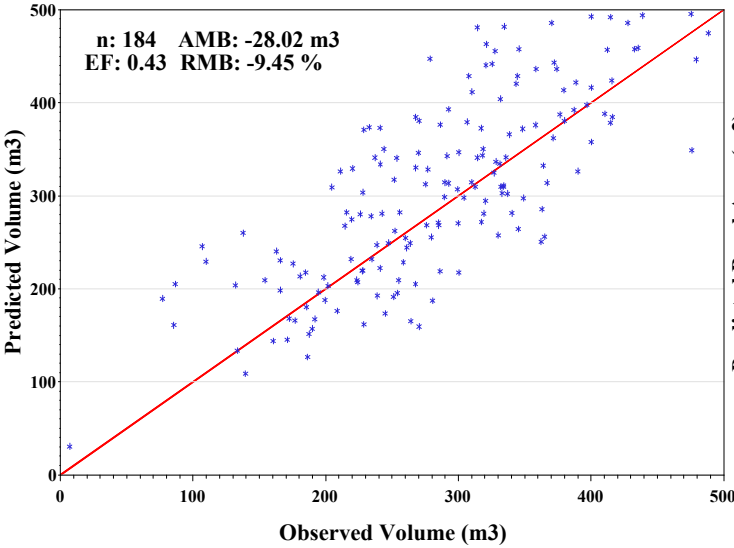

**SRD CD Plots - Conifer Basal Area**

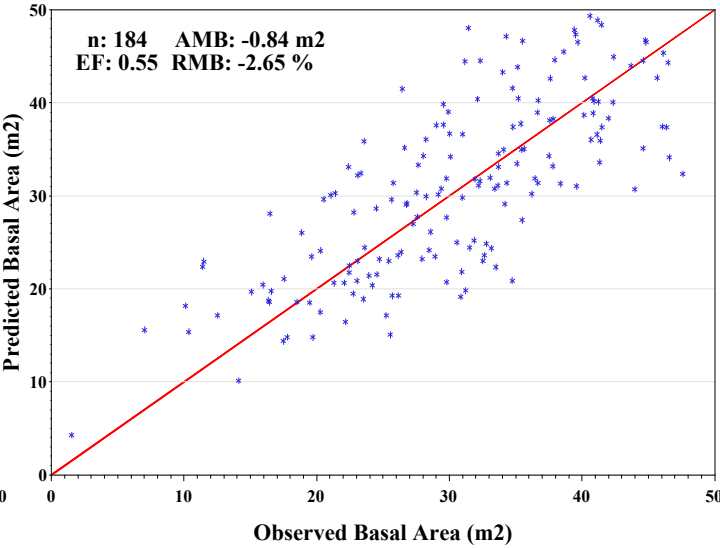

**SRD CD Plots - Conifer Average Height**

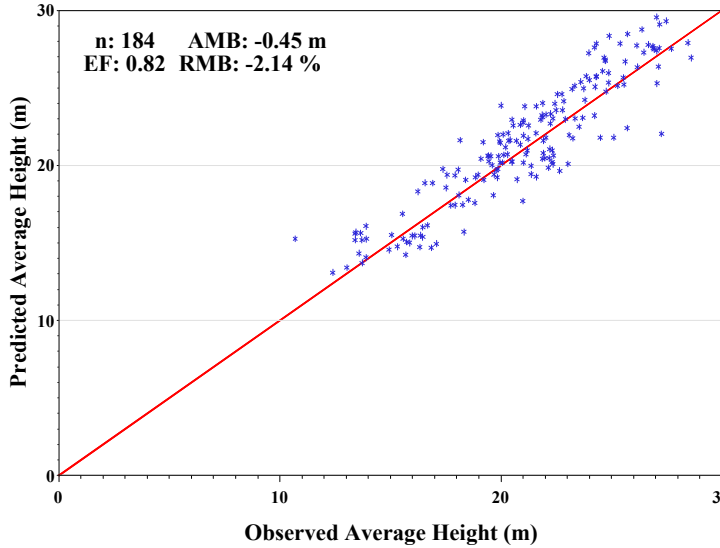

**SRD CD Plots - Conifer Top Height**

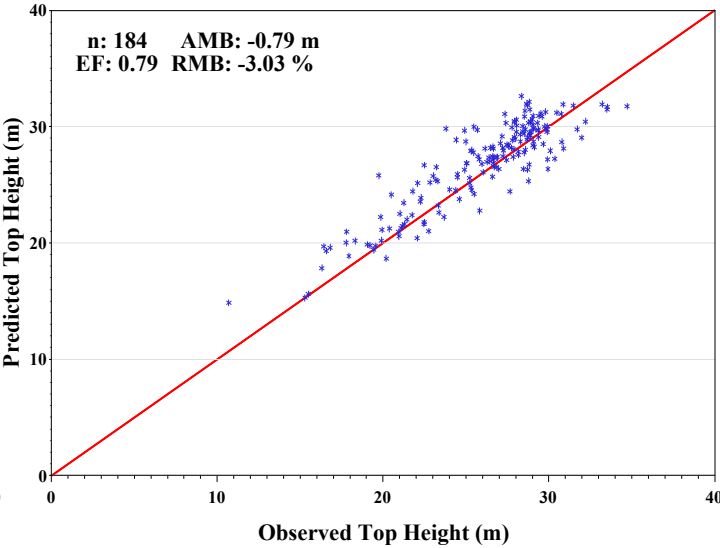

**SRD CD Plots - Conifer DBH**

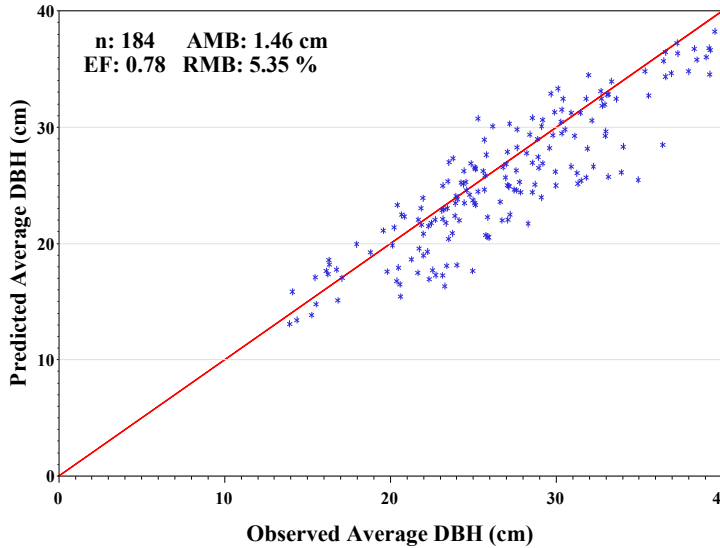

**SRD CD Plots - Conifer Density**

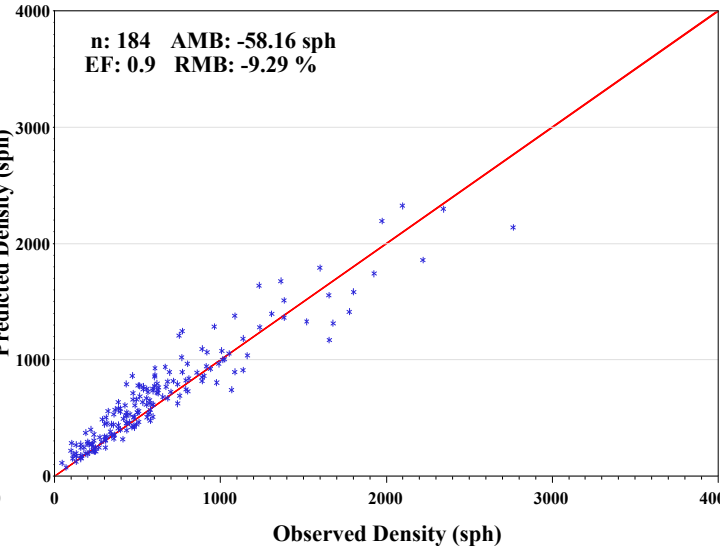

**SRD CD Plots - Deciduous Volume**

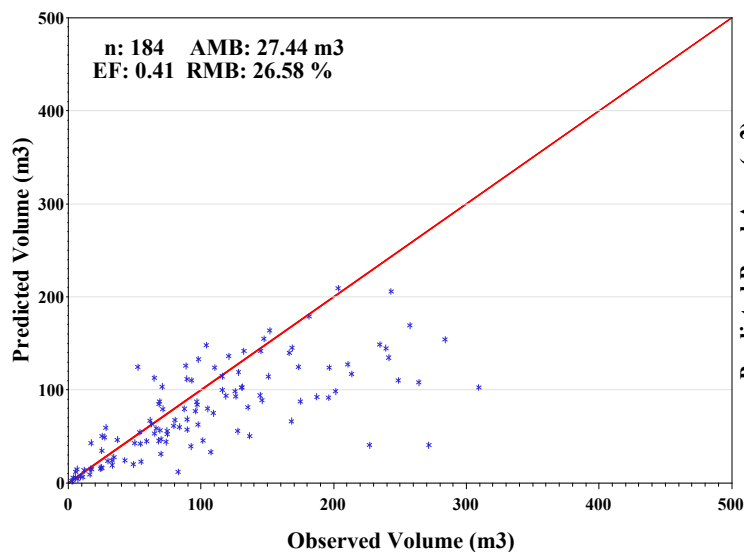

**SRD CD Plots - Deciduous Basal Area**

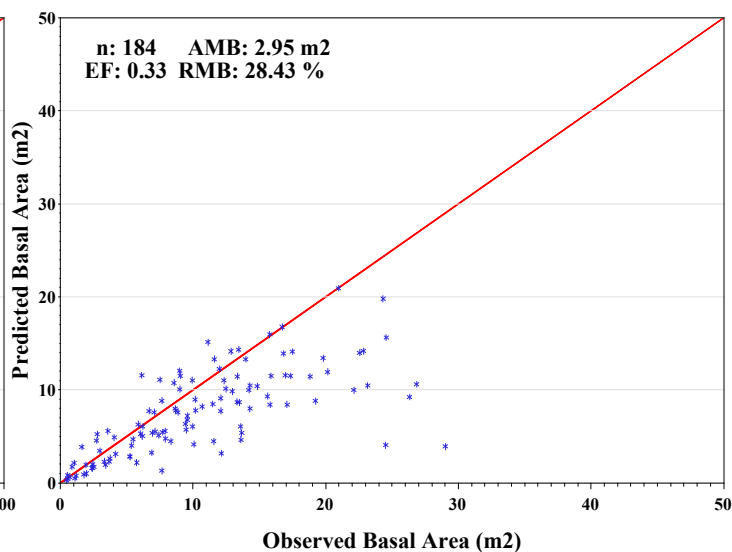

**SRD CD Plots - Deciduous Average Height**

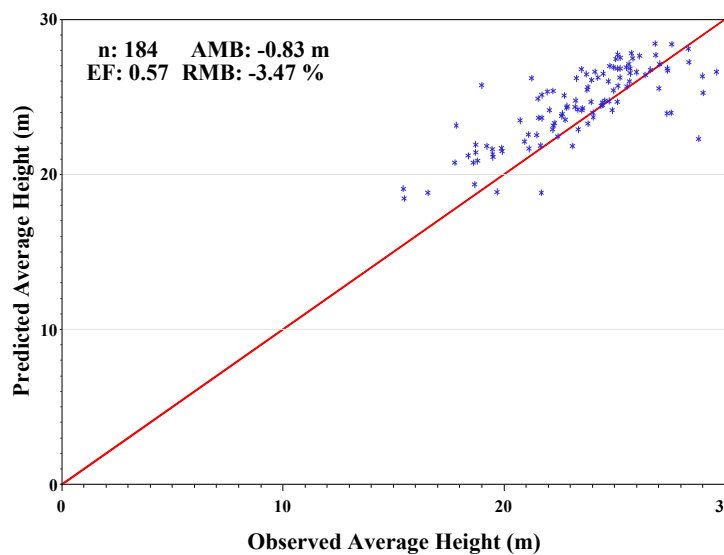

**SRD CD Plots - Deciduous Top Height**

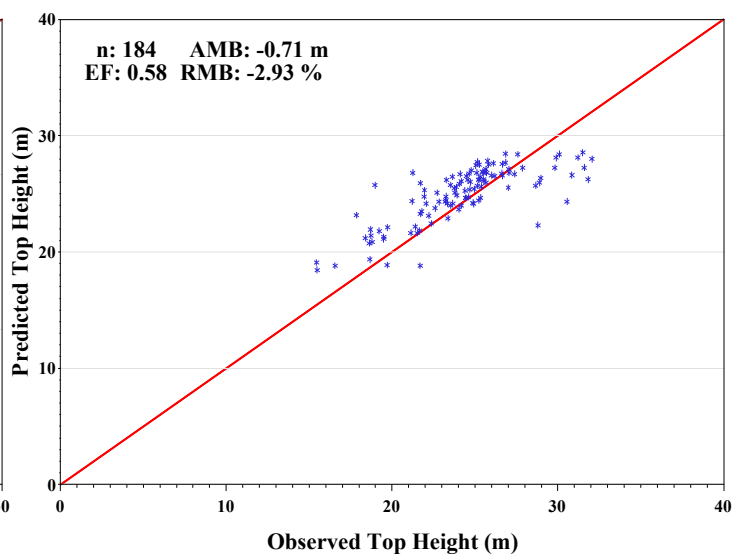

**SRD CD Plots - Deciduous DBH**

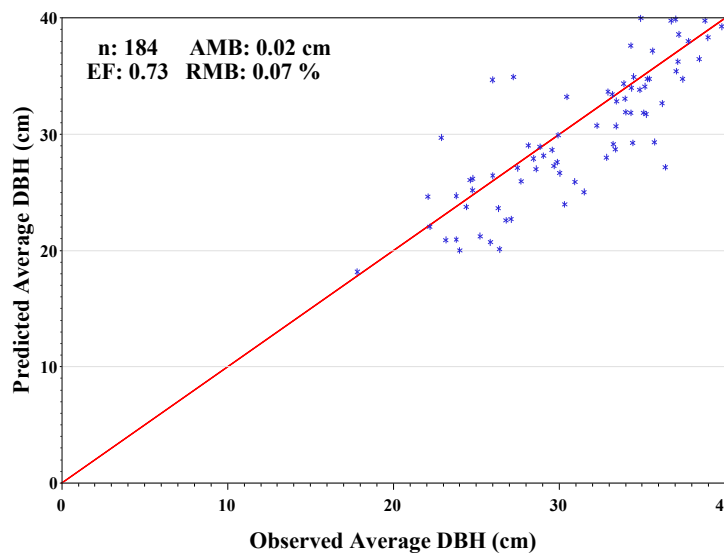

**SRD CD Plots - Deciduous Density**

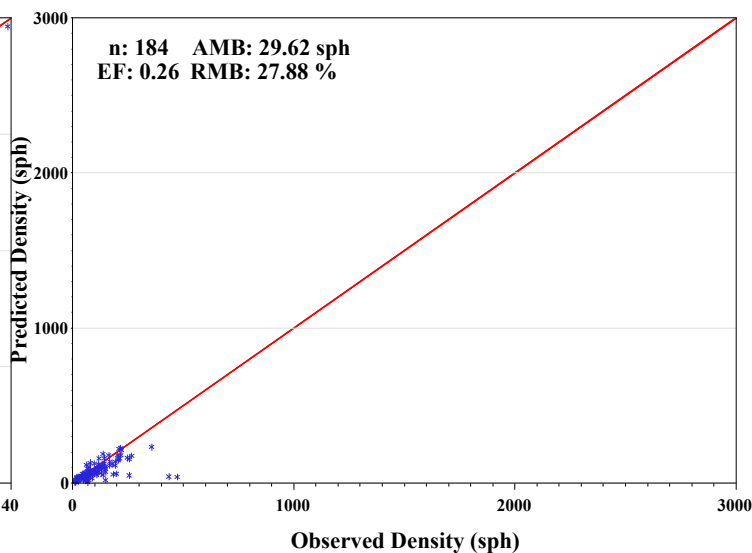

**SRD DC Plots - Conifer Volume**

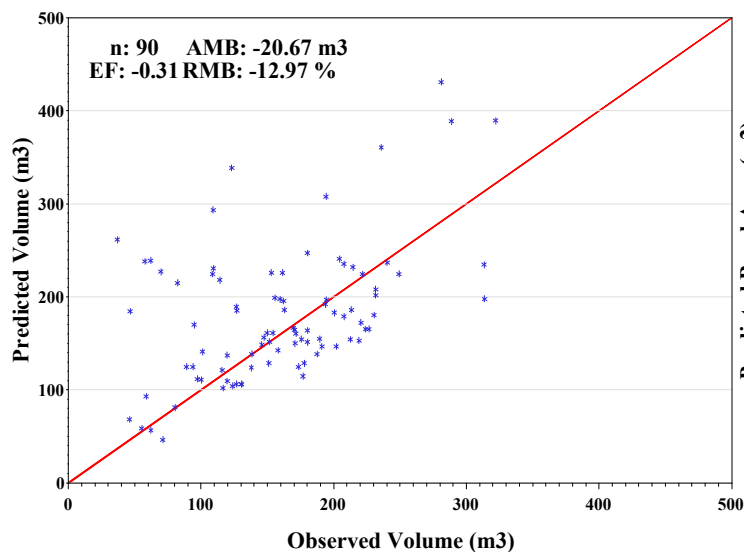

**SRD DC Plots - Conifer Basal Area**

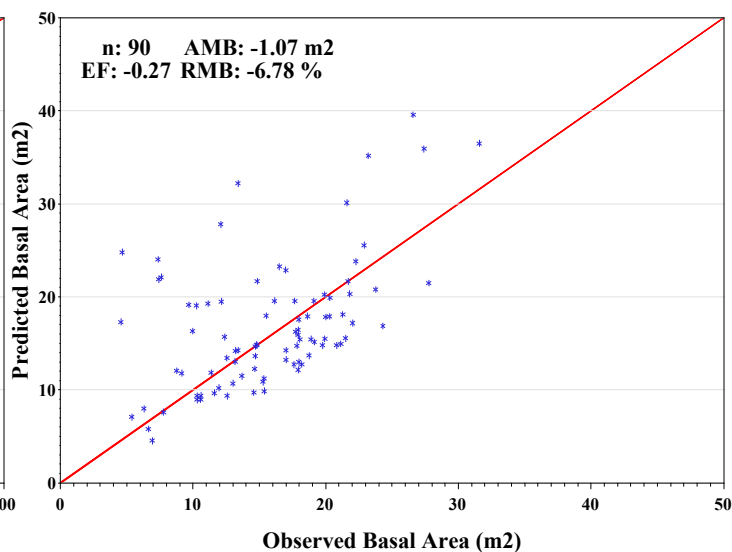

**SRD DC Plots - Conifer Average Height**

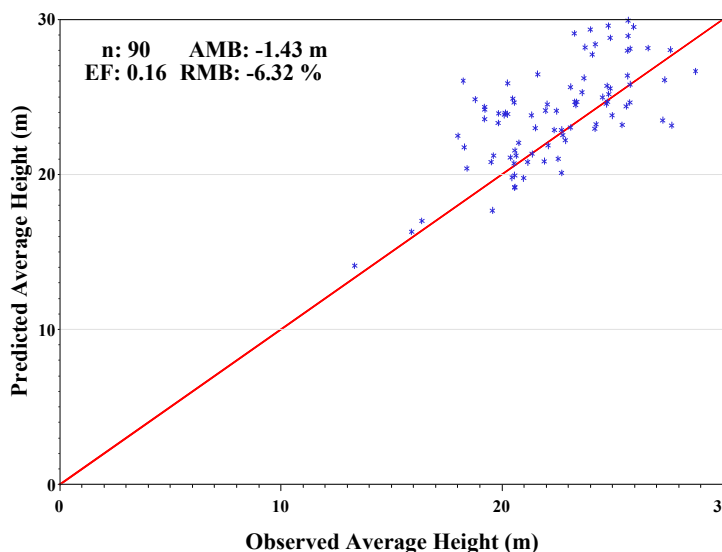

**SRD DC Plots - Conifer Top Height**

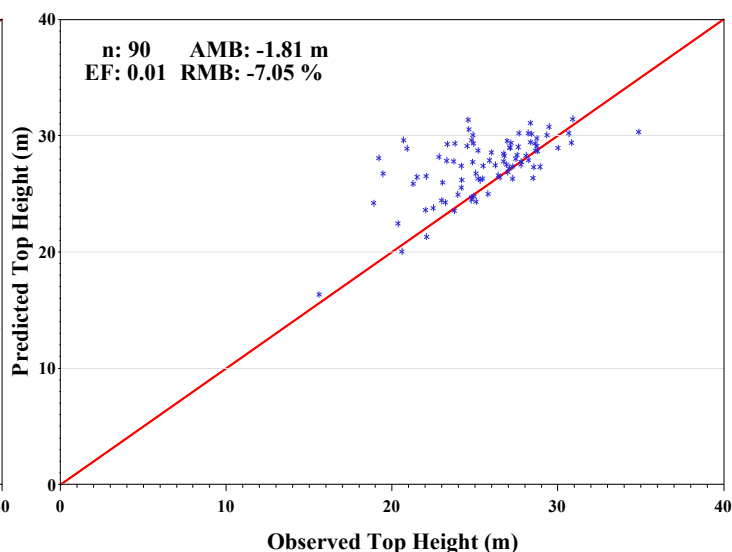

**SRD DC Plots - Conifer DBH**

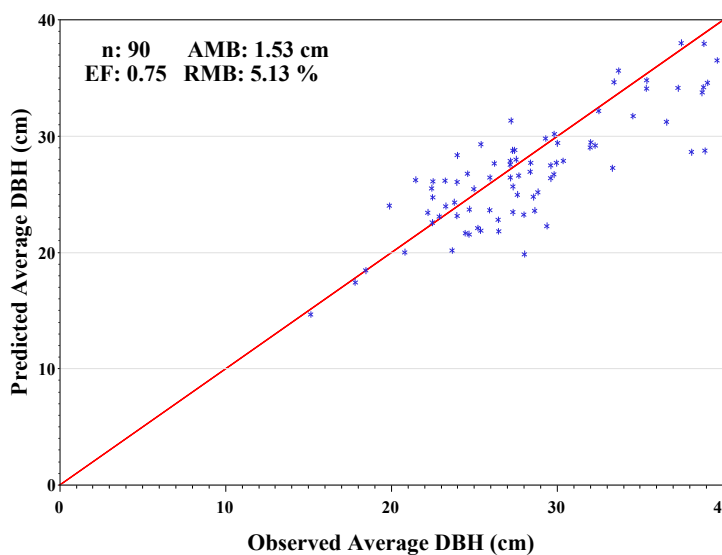

**SRD DC Plots - Conifer Density**

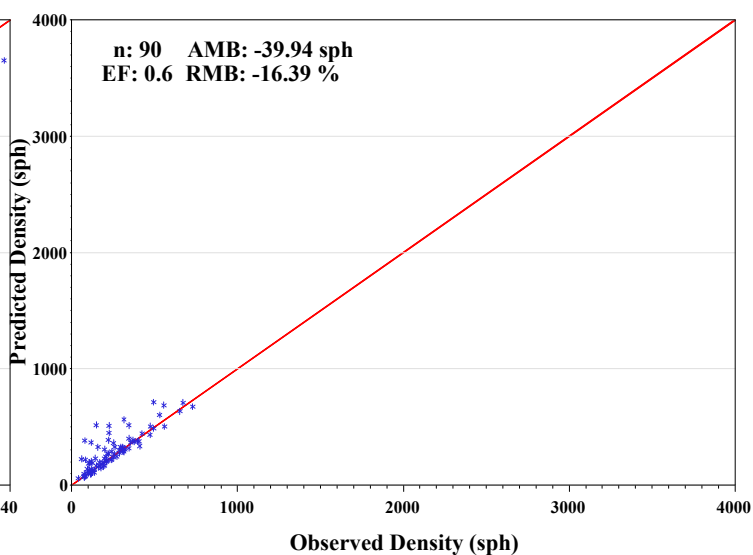

**SRD DC Plots - Deciduous Volume**

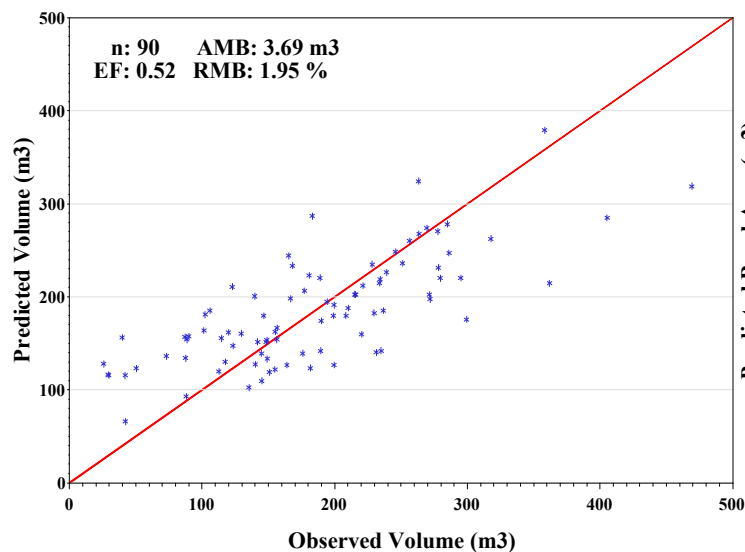

**SRD DC Plots - Deciduous Basal Area**

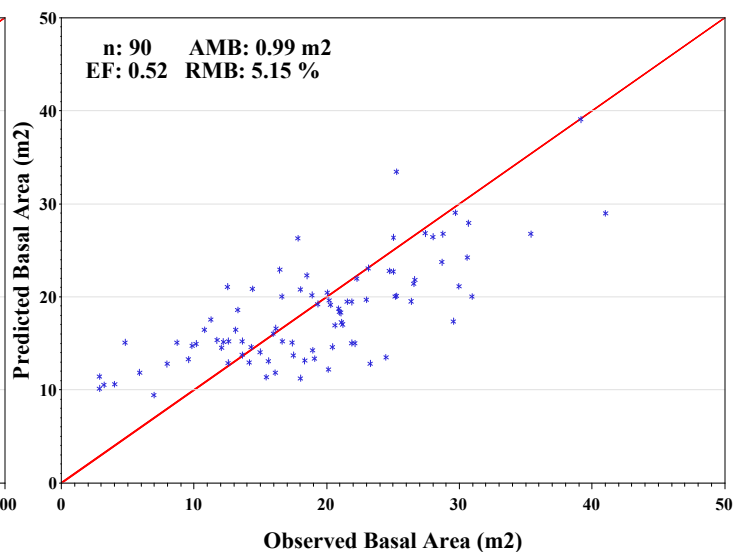

**SRD DC Plots - Deciduous Average Height**

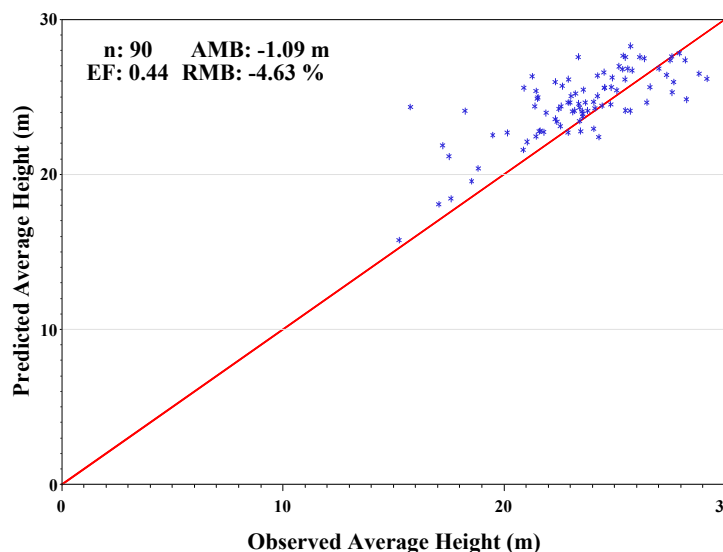

**SRD DC Plots - Deciduous Top Height**

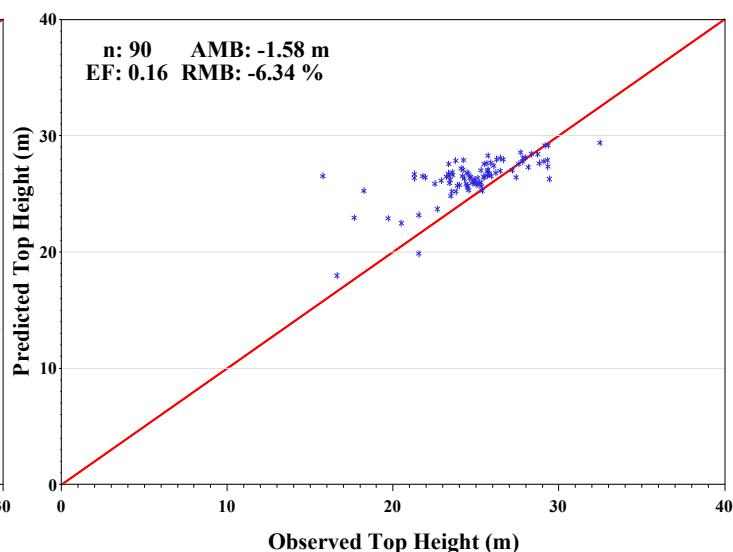

**SRD DC Plots - Deciduous DBH**

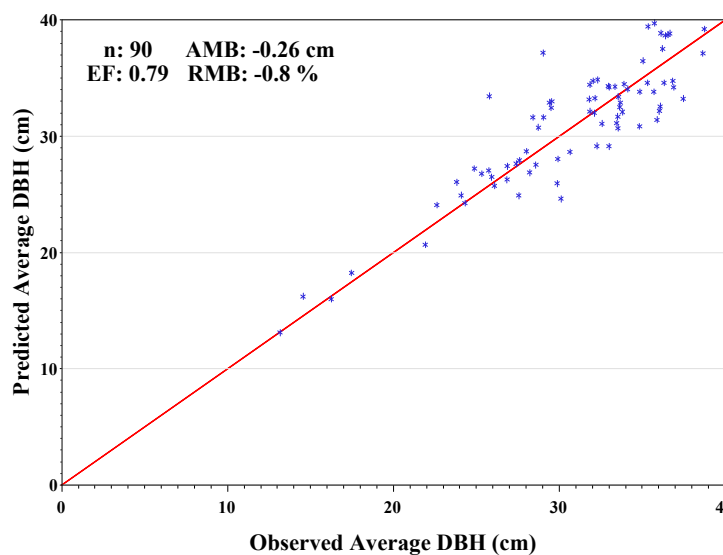

**SRD DC Plots - Deciduous Density**

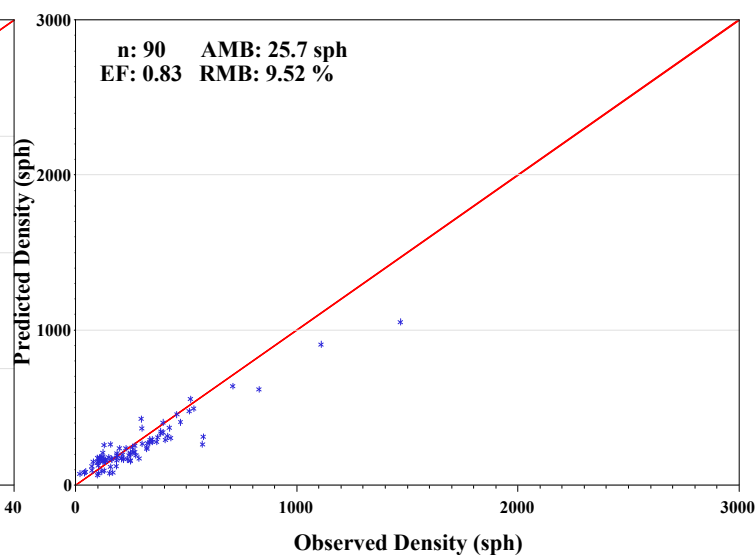

**SRD SW Plots - Conifer Volume**

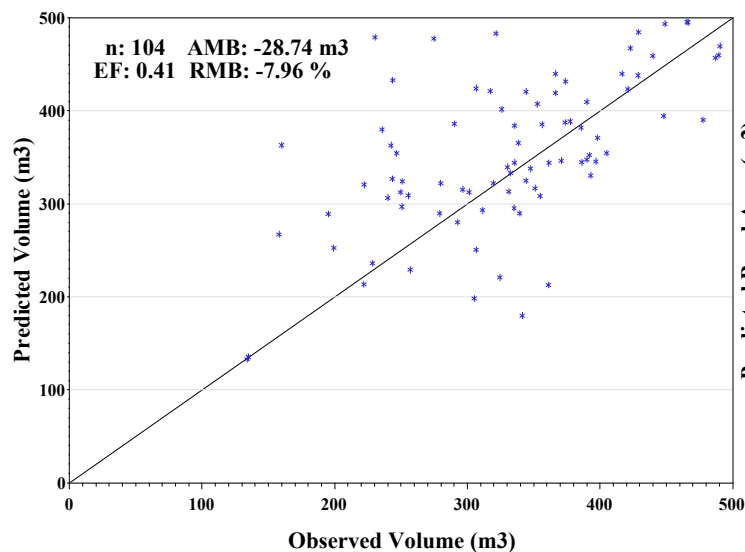

**SRD SW Plots - Conifer Basal Area**

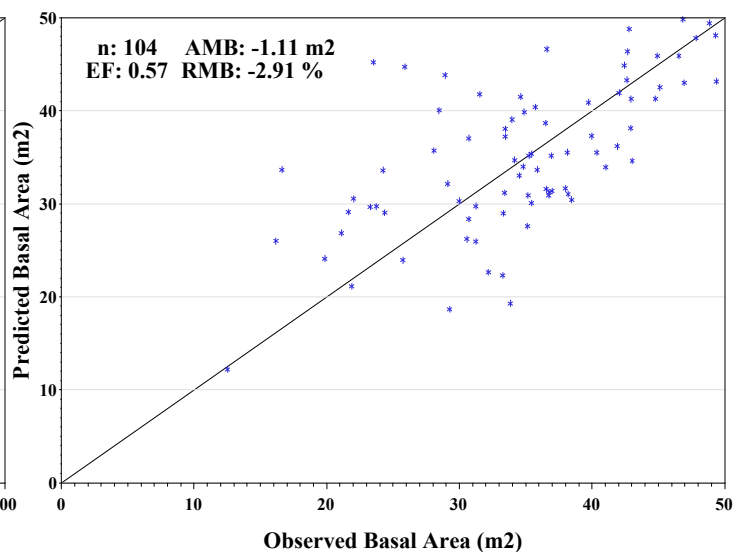

**SRD SW Plots - Conifer Average Height**

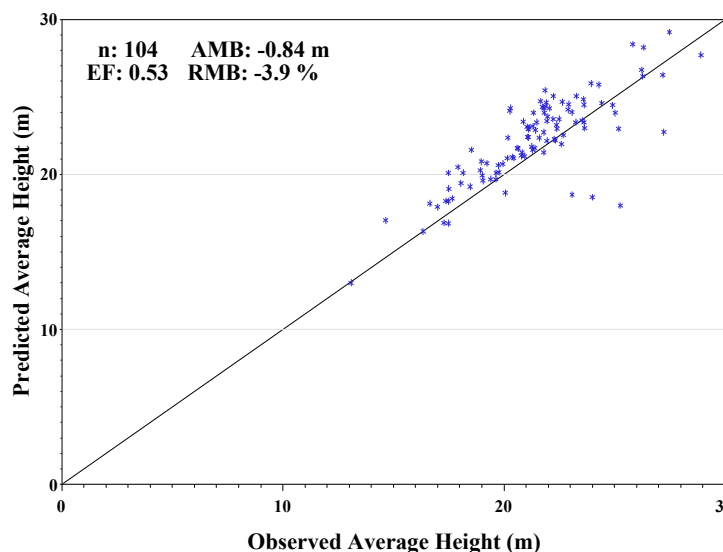

**SRD SW Plots - Conifer Top Height**

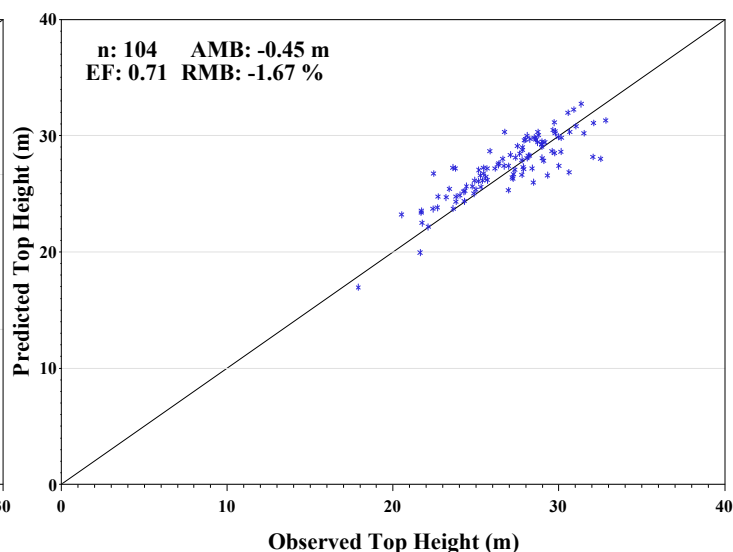

**SRD SW Plots - Conifer DBH**

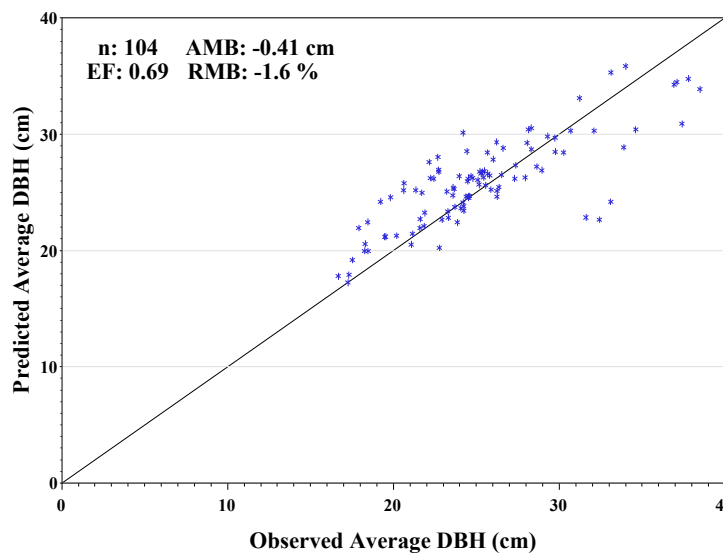

**SRD SW Plots - Conifer Density**

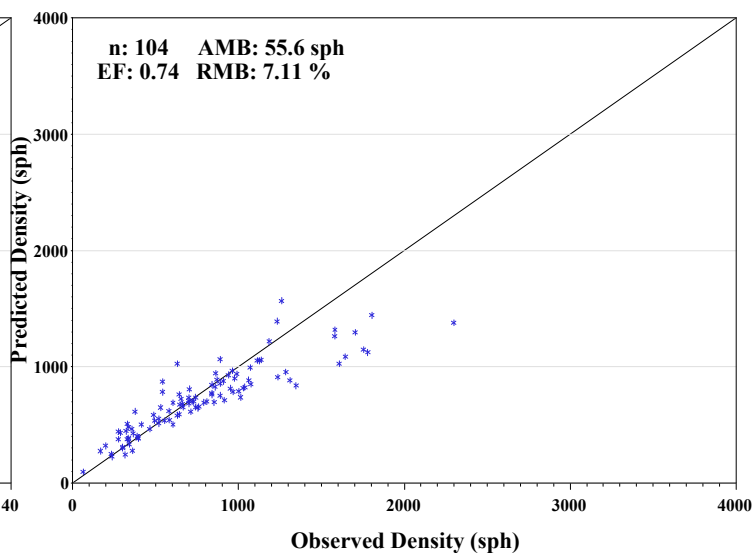



**SRD SW Plots - Deciduous Volume**

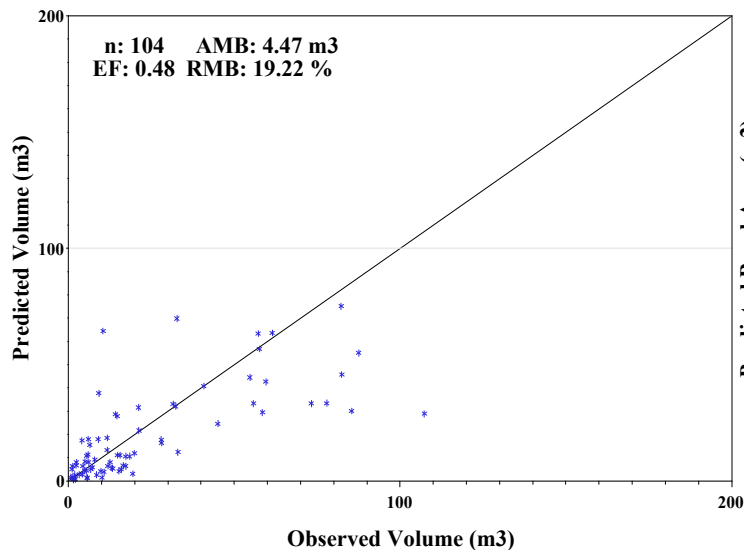

**SRD SW Plots - Deciduous Basal Area**

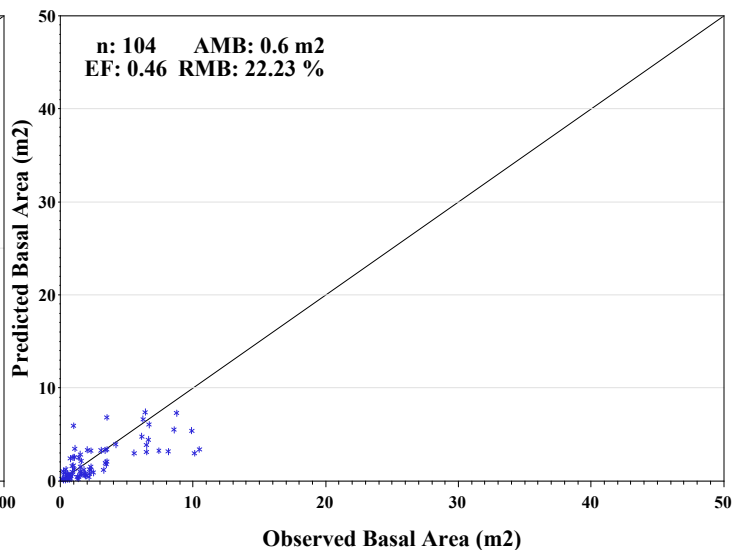

**SRD SW Plots - Deciduous Average Height**

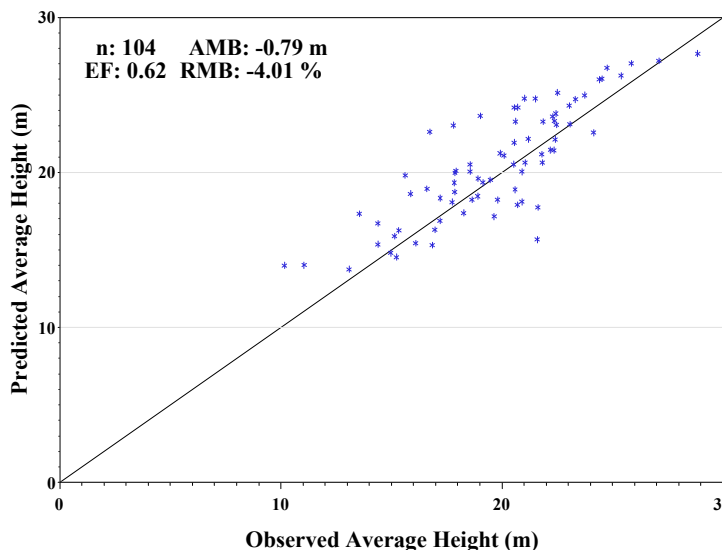

**SRD SW Plots - Deciduous Top Height**

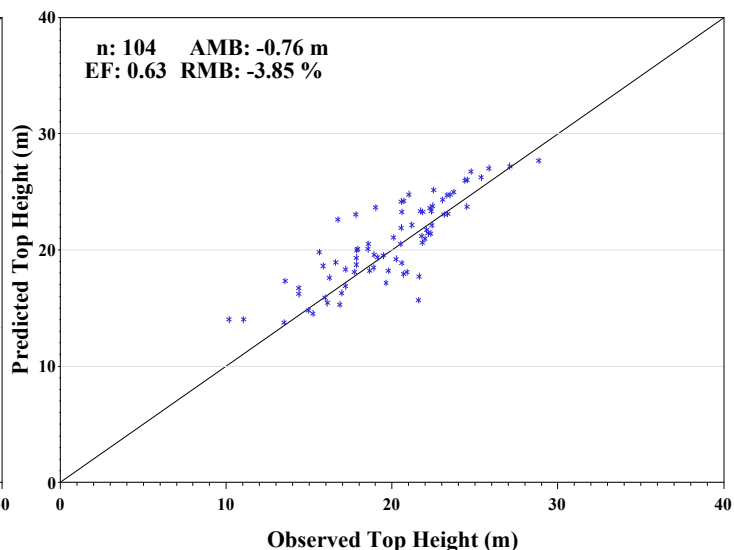

**SRD SW Plots - Deciduous DBH**

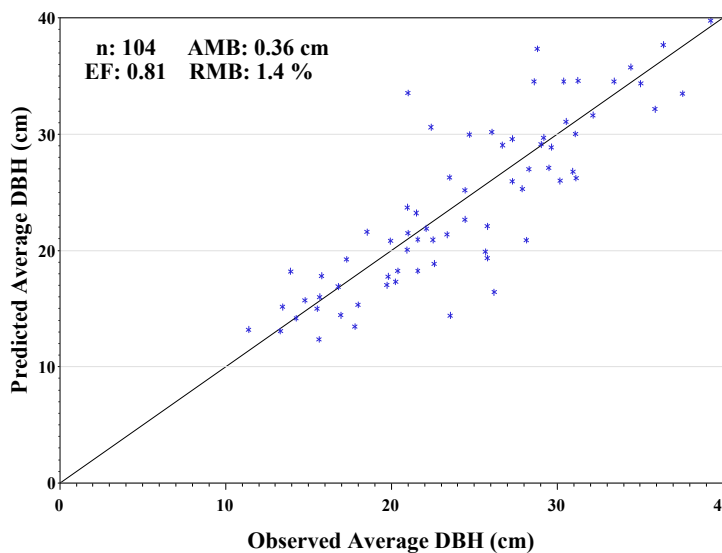

**SRD SW Plots - Deciduous Density**

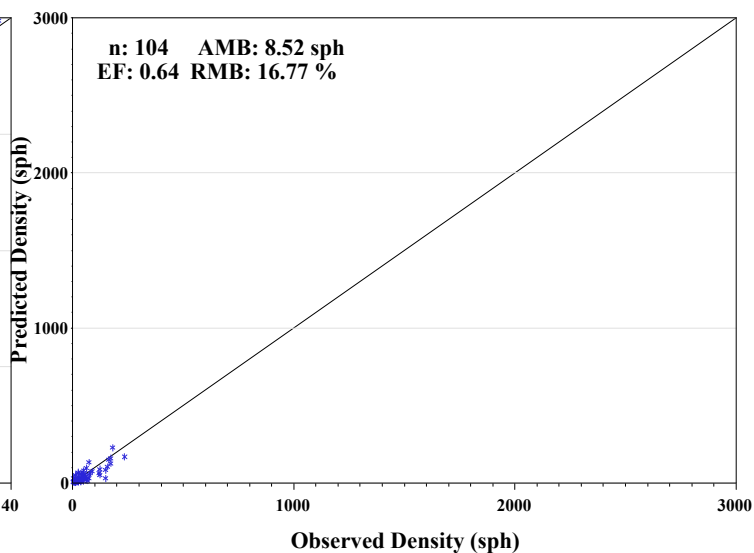

Supplement: s1 [file s1]
