# Supplementary material
Source: MDPI journal article supplement (https://www.mdpi.com/1999-4907/4/1/1)

Appendix B2: Scatterplots showing the distribution of residuals by stand density for the four species groups found in the Alberta SRD dataset.

SW Plots - Conifer Residual Volume vs sDensity

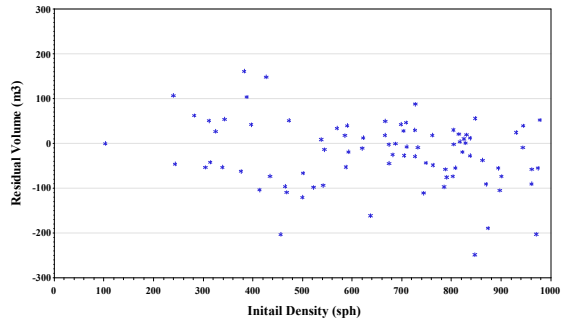

CD Plots - Conifer Residual Volume vs sDensity

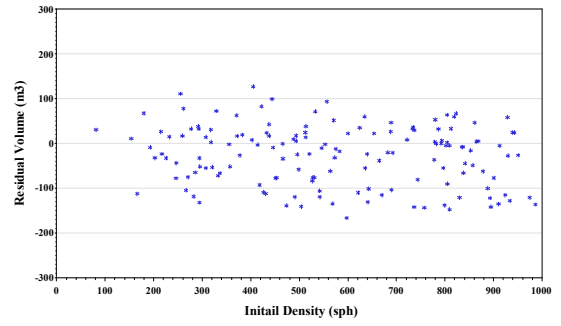

AW Plots - Deciduous Residual Volume vs sDensity

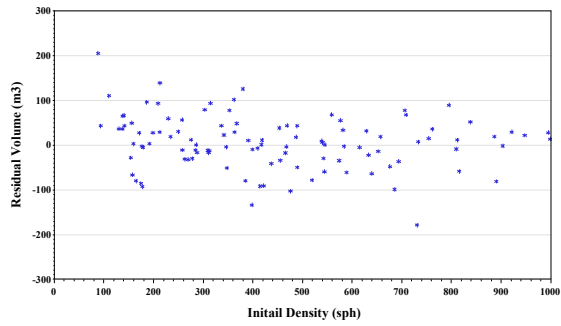

DC Plots - Deciduous Residual Volume vs sDensity

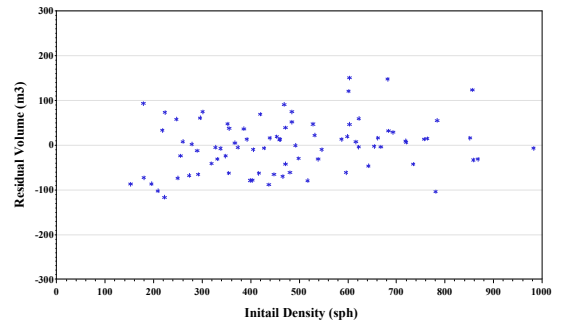

Supplement: s1 [file s1]
